# Supplementary material for: Catalytic oxidation of alkanes by a (salen)osmium(vi) nitrido complex using H2O2as the terminal oxidant
Source: Royal Society of Chemistry journal article supplement (doi:10.1039/c5cc03636d), 2015-01-01
Supplement: c5cc03636d1.pdf [file c5cc03636d1.pdf]

*Electronic Supporting Information*

**Catalytic oxidation of alkanes by a (salen)osmium(VI)  
nitrido complex using H<sub>2</sub>O<sub>2</sub> as the terminal oxidant**

**Man Chen,<sup>a,b,c</sup> Pan Yi,<sup>b</sup> Hoi-Ki Kwong,<sup>b</sup> Raymond J. Zeng,<sup>\*a,c</sup> Kai-  
Chung Lau<sup>\*b</sup> and Tai-Chu Lau<sup>\*a,b</sup>**

<sup>a</sup> *Advanced Laboratory for Environmental Research & Technology (ALERT), USTC-  
CityU, Suzhou 215123, China.*

*Email: bhtclau@cityu.edu.hk*

<sup>b</sup> *Department of Biology and Chemistry and Institute of Molecular Functional  
Materials, City University of Hong Kong, Tat Chee Avenue, Kowloon Tong, Hong  
Kong SAR, China.*

<sup>c</sup> *Department of Chemistry, University of Science & Technology of China, Hefei  
230026, China.*

| <b>Table of Content</b>                                                                                                                                                                                                                                                                                                                                      | <i>Page</i> |
|--------------------------------------------------------------------------------------------------------------------------------------------------------------------------------------------------------------------------------------------------------------------------------------------------------------------------------------------------------------|-------------|
| <b>Experimental Section</b>                                                                                                                                                                                                                                                                                                                                  | S3-S4       |
| <b>Table S1</b> Effects of various solvents on catalytic oxidation of cyclohexane by <b>1</b> /H <sub>2</sub> O <sub>2</sub>                                                                                                                                                                                                                                 | S5          |
| <b>Table S2</b> Catalytic oxidation of cyclohexane by <b>1</b> with slow addition of H <sub>2</sub> O <sub>2</sub>                                                                                                                                                                                                                                           | S5          |
| <b>Table S3</b> KIE for catalytic oxidation of cyclohexane by <b>1</b> /H <sub>2</sub> O <sub>2</sub>                                                                                                                                                                                                                                                        | S6          |
| <b>Table S4</b> Catalytic oxidation of cyclohexane by <b>1</b> /H <sub>2</sub> O <sub>2</sub> under various conditions                                                                                                                                                                                                                                       | S6          |
| <b>Table S5</b> Catalytic oxidation of cyclohexane by <b>1</b> /H <sub>2</sub> <sup>18</sup> O <sub>2</sub>                                                                                                                                                                                                                                                  | S7          |
| <b>Scheme S1</b> Reaction mechanism (H <sub>2</sub> O <sub>2</sub> is <i>cis</i> to the nitrido ligand) with FeCl <sub>3</sub> obtained at B3LYP level. ΔG (298K) free energies are in kcal/mol. Basis sets: LanL2DZ for Os and Fe, 6-31G(d) for non-metal. Solvent: CH <sub>3</sub> CO <sub>2</sub> H.                                                      | S8          |
| <b>Scheme S2</b> Reaction mechanism (H <sub>2</sub> O <sub>2</sub> is <i>trans</i> to the nitrido ligand) with FeCl <sub>3</sub> (in black) and without FeCl <sub>3</sub> (in blue) obtained at B3LYP level. ΔG (298K) free energies are in kcal/mol. Basis sets: LanL2DZ for Os and Fe, 6-31G(d) for non-metal. Solvent: CH <sub>3</sub> CO <sub>2</sub> H. | S8          |
| <b>Scheme S3</b> Structures of intermediates and transition states in Schemes S1 and S2. The selective bond lengths of INT1c, TS1c, and INT2c are shown in italic form.                                                                                                                                                                                      | S9          |
| <b>The Cartesian coordinates of all the structures in Scheme 1</b>                                                                                                                                                                                                                                                                                           | S10-S24     |
| <b>The Cartesian coordinate of all the structures on Scheme S1, S2, and S3</b>                                                                                                                                                                                                                                                                               | S24-S52     |
| <b>The electronic energies (E, in hartress) and electronic energies with ΔH or ΔG correction at 298 K for all the intermediates and TSs.</b>                                                                                                                                                                                                                 | S53-S54     |

## Experimental Section

**Materials.** All chemicals were of reagent grade unless otherwise specified. [1]PF<sub>6</sub> was synthesized according to a literature method.<sup>1</sup> All organic substrates were obtained from Sigma Aldrich and purified according to literature methods.<sup>2</sup> Hydrogen peroxide (35%, Sigma Aldrich) was used as received and standardized by iodometry.<sup>3</sup> 2-Methyl-1-phenyl-2-propyl hydroperoxide (MPPH) was prepared according to a literature method,<sup>4</sup> and its purity was determined to be >99% by NMR spectroscopy. Active MPPH levels were further measured by iodometric titrations, which showed >99% peroxide activity. Cyclohexane-*d*<sub>12</sub> (99.6 atom % D) was purchased from Sigma Aldrich and used as received. Bromotrichloromethane was purchased from Aldrich and was purified by passing through a short column of neutral alumina prior to use.

**Instrumentation.** Gas chromatographic analyses of organic products were performed on a HP5890 GC/FID equipped with a DB-FFAP column (30 m × 0.25 mm i.d.). GC/MS measurements were carried out on an Agilent 6890N gas chromatograph interfaced to a 5975 mass selective detector.

**Catalytic Oxidation of Alkanes.** The oxidant (0.5 M) was added into a yellow solution of **1** (0.625 mM) in CH<sub>2</sub>Cl<sub>2</sub>/CH<sub>3</sub>CO<sub>2</sub>H (5:2, v/v) containing a substrate (1.2 M) at 23 °C. The mixture was vigorously stirred under argon. Chlorobenzene was then added as an internal standard, and the organic products were identified and quantified by GC/FID and GC/MS at various time intervals.

Catalytic oxidation of cyclohexane was also carried out by slow addition of H<sub>2</sub>O<sub>2</sub>. A solution of H<sub>2</sub>O<sub>2</sub> (0.17 M) in CH<sub>2</sub>Cl<sub>2</sub>/CH<sub>3</sub>CO<sub>2</sub>H (5:2, v/v) was slowly added within

3 h into a solution of **1** (0.045 mM) in CH<sub>2</sub>Cl<sub>2</sub>/CH<sub>3</sub>CO<sub>2</sub>H (5:2, v/v) containing cyclohexane (0.69 M or 1.37 M) at 23 °C. The mixture was vigorously stirred for 24 h. Chlorobenzene was then added as an internal standard, and the organic products were analyzed by GC/FID and GC/MS.

When MPPH was used as the oxidant, PPh<sub>3</sub> (5 M) was added into the reaction mixture before product analysis in order to consume all unreacted MPPH since MPPH will decompose in the GC injection port to give a variety of products. The amount of unreacted MPPH was determined based on the amount of PPh<sub>3</sub>=O generated. When no PPh<sub>3</sub>=O could be detected, it was assumed that all MPPH was consumed.

Kinetic isotope effects (KIEs) were investigated by using an equimolar mixture of cyclohexane and cyclohexane-*d*<sub>12</sub> as the substrate. The organic products were identified and quantified by GC/FID and GC/MS. The KIE value was calculated by taking the ratio of the corresponding peak areas of non deuterated and deuterated organic products from GC measurements.

**Theoretical method.** All optimizations and frequency calculations were done at B3LYP (Becke three-parameter Lee–Yang–Parr hybrid functional) level<sup>5</sup> using LanL2DZ basis set<sup>6</sup> for Os and Fe, and 6-31G(d) basis set for nonmetal atoms. The solvent effect of CH<sub>3</sub>CO<sub>2</sub>H (acetic acid) is taken into account by the polarizable continuum model.<sup>7</sup> The geometries were fully optimized without symmetry or geometry constraint. The nature of all stationary points was confirmed by vibrational frequencies calculations. All reactants, intermediates, and products have no imaginary frequency while all transition states have only one imaginary frequency. The connectivity of transition state structures were confirmed by intrinsic reaction coordinate calculations.

**Table S1.** Effects of various solvents on catalytic oxidation of cyclohexane by **1**/H<sub>2</sub>O<sub>2</sub><sup>a</sup>

| Entry | Various solvents                                                               | Products yield <sup>b</sup> |      |       | Total yield |
|-------|--------------------------------------------------------------------------------|-----------------------------|------|-------|-------------|
|       |                                                                                | Cy-OH                       | Cy=O | Cy-Cl |             |
| 1     | CH <sub>2</sub> Cl <sub>2</sub> /CH <sub>3</sub> CO <sub>2</sub> H (5:2, v/v)  | 61%                         | 12%  | 2%    | 75%         |
| 2     | CH <sub>2</sub> Cl <sub>2</sub> /CF <sub>3</sub> CH <sub>2</sub> OH (5:2, v/v) | 63%                         | 6%   | 1%    | 70%         |
| 3     | CF <sub>3</sub> CH <sub>2</sub> OH with 1.4% CH <sub>3</sub> CO <sub>2</sub> H | 53%                         | 3%   | n.d.  | 56%         |
| 4     | CF <sub>3</sub> CH <sub>2</sub> OH                                             | 51%                         | 3%   | n.d.  | 54%         |
| 5     | CH <sub>3</sub> CN                                                             | n.d.                        | n.d. | n.d.  | 0%          |

<sup>a</sup>Reaction conditions: **1** (0.625 mM), cyclohexane (1.2 M), H<sub>2</sub>O<sub>2</sub> (50 mM, 80 eq.), T = 23 °C, time = 3 h, under argon.

<sup>b</sup>Product yields were calculated based on H<sub>2</sub>O<sub>2</sub> acting as a two-electron oxidant.

**Table S2.** Catalytic oxidation of cyclohexane by **1** with slow addition of H<sub>2</sub>O<sub>2</sub><sup>a</sup>

| Entry | Cyclohexane | Products yield <sup>b</sup> |      |       | Total yield | TON  | Time   |
|-------|-------------|-----------------------------|------|-------|-------------|------|--------|
|       |             | Cy-OH                       | Cy=O | Cy-Cl |             |      |        |
| 1     | 0.69 M      | 16%                         | 4%   | 1%    | 21%         | 787  | 15 min |
|       |             | 18%                         | 5%   | 1%    | 24%         | 918  | 1.5 h  |
|       |             | 20%                         | 6%   | 1%    | 27%         | 1025 | 2.5 h  |
|       |             | 22%                         | 8%   | 1%    | 31%         | 1183 | 3.5 h  |
|       |             | 31%                         | 26%  | 1%    | 58%         | 2230 | 20 h   |
| 2     | 1.37 M      | 10%                         | 1%   | tr.   | 11%         | 415  | 15 min |
|       |             | 24%                         | 4%   | 1%    | 29%         | 1083 | 16.5 h |

<sup>a</sup> Reaction conditions: **1** (0.045 mM), CH<sub>2</sub>Cl<sub>2</sub>/CH<sub>3</sub>CO<sub>2</sub>H (5:2), H<sub>2</sub>O<sub>2</sub> (0.17 M) was slowly added within 3 h using syringe pump, T = 23 °C, under argon. <sup>b</sup> Products yields were calculated based on H<sub>2</sub>O<sub>2</sub> acting as a two-electron oxidant.

**Table S3.** KIE for catalytic oxidation of cyclohexane by **1**/H<sub>2</sub>O<sub>2</sub>

| <b>KIE for cyclohexanol</b> | <b>KIE for cyclohexanone</b> | <b>KIE for chlorocyclohexane</b> | <b>Overall K. I. E.</b> |
|-----------------------------|------------------------------|----------------------------------|-------------------------|
| 4.12                        | 9.74                         | 1.69                             | 4.16                    |

Reaction conditions: **1** (0.625 mM), cyclohexane/cyclohexane-*d*<sub>12</sub> (1:1) (1.2 M), CH<sub>2</sub>Cl<sub>2</sub>/CH<sub>3</sub>CO<sub>2</sub>H (5:2, v/v), H<sub>2</sub>O<sub>2</sub> (50 mM, 80 equiv.), T = 23 °C, time = 3 h, under argon.

**Table S4.** Catalytic oxidation of cyclohexane by **1**/H<sub>2</sub>O<sub>2</sub> under various conditions<sup>a</sup>

| <b>Entry</b> | <b>Cyclohexane</b> | <b>H<sub>2</sub>O<sub>2</sub></b> | <b>Products yield<sup>b</sup></b> |             |              | <b>Total yield</b> | <b>Alcohol/ketone ratio</b> |
|--------------|--------------------|-----------------------------------|-----------------------------------|-------------|--------------|--------------------|-----------------------------|
|              |                    |                                   | <b>Cy-OH</b>                      | <b>Cy=O</b> | <b>Cy-Cl</b> |                    |                             |
| 1            | 1.2 M              | 25 mM                             | 35%                               | 3%          | 2%           | 40%                | 11.7                        |
| 2            | 1.2 M              | 50 mM                             | 61%                               | 12%         | 2%           | 75%                | 5.1                         |
| 3            | 1.2 M              | 100 mM                            | 30%                               | 20%         | 3%           | 53%                | 1.5                         |
| 4            | 2.4 M              | 50 mM                             | 62%                               | 8%          | 2%           | 72%                | 7.8                         |

<sup>a</sup>Reaction conditions: **1** (0.625 mM), CH<sub>2</sub>Cl<sub>2</sub>/CH<sub>3</sub>CO<sub>2</sub>H (5:2, v/v), T = 23 °C, time = 3 h, under argon. <sup>b</sup>Products yields were calculated based on H<sub>2</sub>O<sub>2</sub> acting as a two-electron oxidant.

**Table S5** Catalytic oxidation of cyclohexane by **1**/H<sub>2</sub><sup>18</sup>O<sub>2</sub><sup>a</sup>

| <b>Products</b> | <b>Products yield<sup>b</sup></b> | <b>% <sup>18</sup>O-labeled</b> |
|-----------------|-----------------------------------|---------------------------------|
| Cy-OH           | 30%                               | 100%                            |
| Cy=O            | 5%                                | 12%                             |

<sup>a</sup>Reaction conditions: **1** (0.625 mM), cyclohexane (1.2 M), CH<sub>2</sub>Cl<sub>2</sub>/CH<sub>3</sub>CO<sub>2</sub>H (5:2 v/v), H<sub>2</sub><sup>18</sup>O<sub>2</sub> (0.165 M), T = 23 °C, time = 5 h, under argon. <sup>b</sup> Product yield = mmol of product / mmol of H<sub>2</sub><sup>18</sup>O<sub>2</sub>.

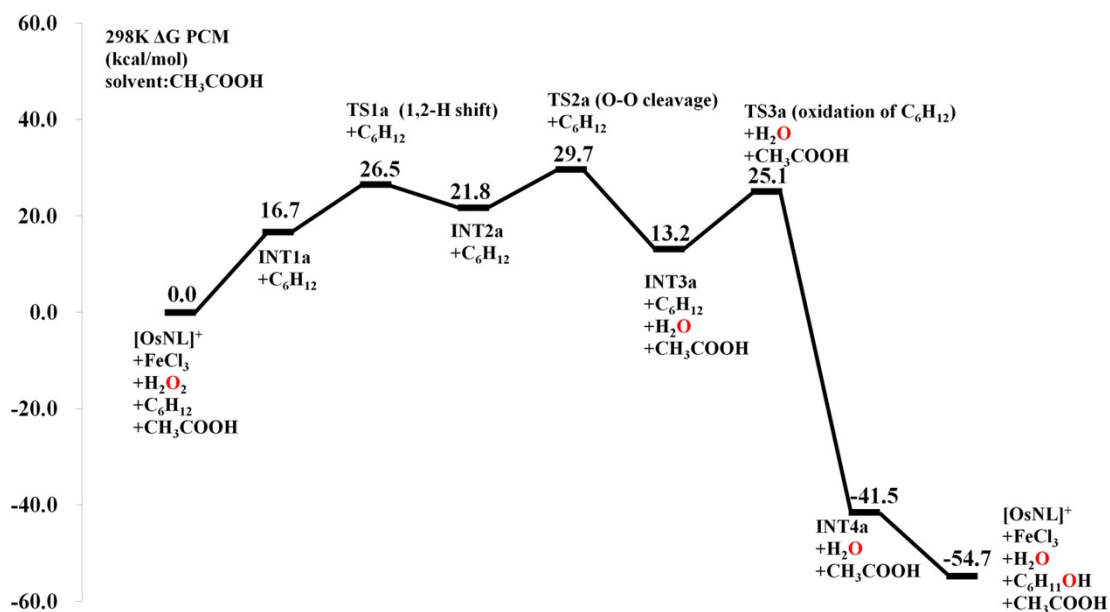

**Scheme S1.** Reaction mechanism (H<sub>2</sub>O<sub>2</sub> is *cis* to the nitrido ligand) with FeCl<sub>3</sub> obtained at B3LYP level.  $\Delta G$  (298K) free energies are in kcal/mol. Basis sets: LanL2DZ for Os and Fe, 6-31G(d) for non-metal. Solvent: CH<sub>3</sub>CO<sub>2</sub>H.

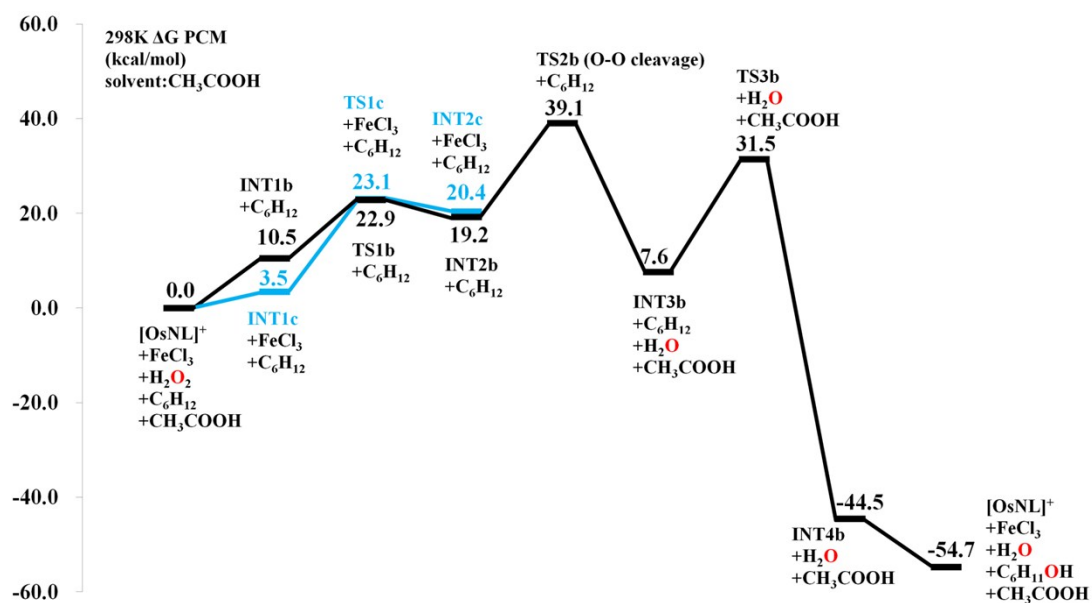

**Scheme S2.** Reaction mechanism (H<sub>2</sub>O<sub>2</sub> is *trans* to the nitrido ligand) with FeCl<sub>3</sub> (in black) and without FeCl<sub>3</sub> (in blue) obtained at B3LYP level.  $\Delta G$  (298K) free energies are in kcal/mol. Basis sets: LanL2DZ for Os and Fe, 6-31G(d) for non-metal. Solvent: CH<sub>3</sub>CO<sub>2</sub>H.



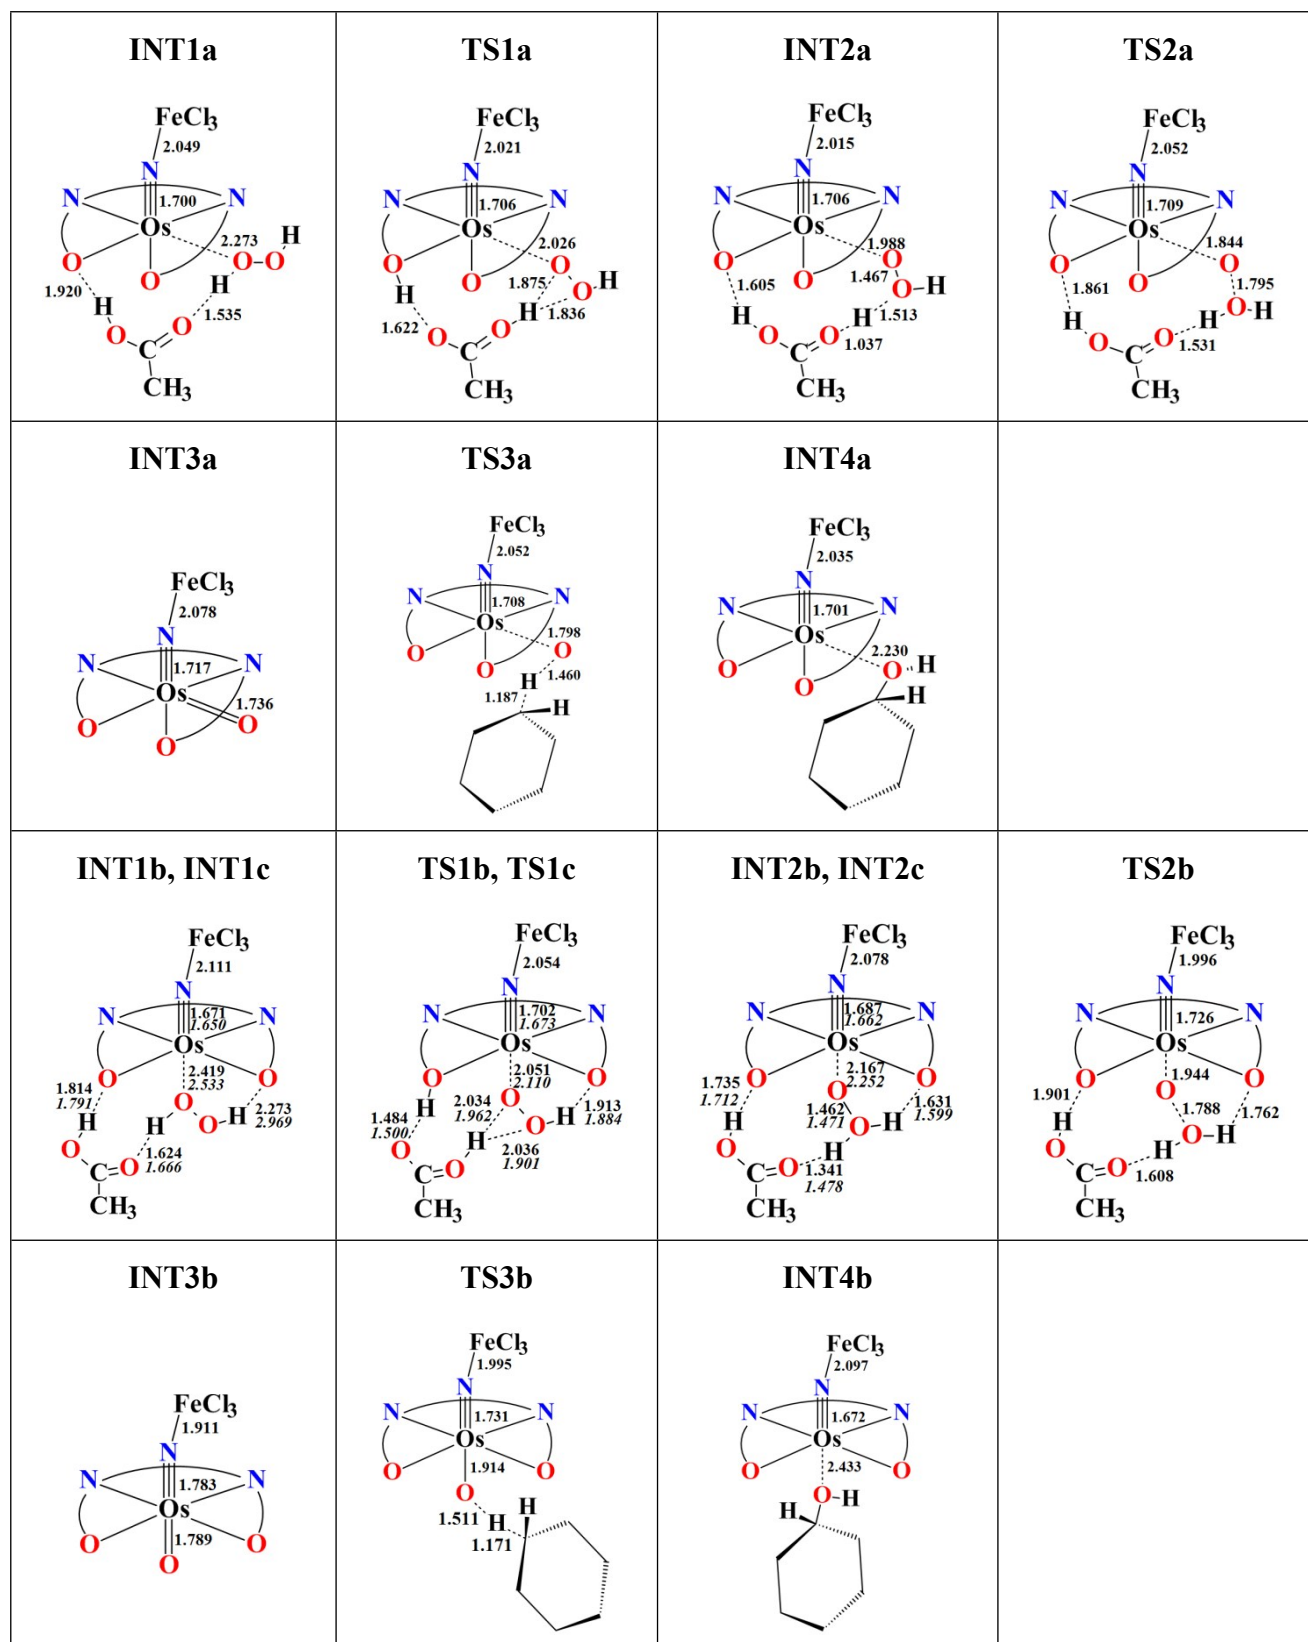

**Scheme S3.** Structures of intermediates and transition states in Schemes S1 and S2.

## The Cartesian coordinates of all the structures in Scheme 1

### Reactant: [OsNL]<sup>+</sup>

|   |           |           |           |
|---|-----------|-----------|-----------|
| N | -0.112582 | -0.386047 | 2.138518  |
| N | -1.247515 | 1.045828  | -0.193874 |
| N | 1.367525  | 1.006339  | 0.106232  |
| O | -1.347817 | -1.823866 | -0.063809 |
| O | 1.233086  | -1.862475 | -0.079887 |
| C | -0.562805 | 2.342823  | -0.510979 |
| C | -1.365121 | 3.614141  | -0.204684 |
| C | 0.772189  | 2.360951  | 0.253637  |
| H | -0.335776 | 2.310000  | -1.585231 |
| C | -0.529686 | 4.853989  | -0.577767 |
| H | -1.627161 | 3.629510  | 0.861294  |
| H | -2.300569 | 3.634038  | -0.772321 |
| C | 1.628751  | 3.556231  | -0.167930 |
| H | 0.546534  | 2.455186  | 1.325092  |
| C | 0.846828  | 4.856701  | 0.100876  |
| H | -1.086478 | 5.756038  | -0.302570 |
| H | -0.401883 | 4.883207  | -1.668321 |
| H | 2.565056  | 3.572804  | 0.400439  |
| H | 1.884980  | 3.479821  | -1.233119 |
| H | 1.437653  | 5.709990  | -0.248333 |
| H | 0.723278  | 4.981867  | 1.184822  |
| C | -2.653279 | -1.626598 | -0.213053 |
| C | -3.259936 | -0.341497 | -0.382727 |
| C | -3.473814 | -2.771233 | -0.255316 |
| C | -4.666320 | -0.260569 | -0.586693 |
| C | -4.842330 | -2.652803 | -0.437814 |
| H | -3.001043 | -3.740404 | -0.137506 |
| C | -5.452097 | -1.392312 | -0.602896 |
| H | -5.113499 | 0.719786  | -0.726182 |
| H | -5.453188 | -3.550739 | -0.458257 |
| H | -6.524163 | -1.317249 | -0.748692 |
| C | 2.552366  | -1.736328 | -0.249646 |
| C | 3.250849  | -0.490913 | -0.310658 |
| C | 3.279118  | -2.927343 | -0.428890 |
| C | 4.650983  | -0.495268 | -0.553397 |

|    |           |           |           |
|----|-----------|-----------|-----------|
| C  | 4.647717  | -2.895142 | -0.654849 |
| H  | 2.736094  | -3.865454 | -0.388101 |
| C  | 5.346897  | -1.675245 | -0.717679 |
| H  | 5.170042  | 0.457956  | -0.603294 |
| H  | 5.184124  | -3.830142 | -0.788154 |
| H  | 6.416559  | -1.663603 | -0.896193 |
| C  | -2.520971 | 0.872224  | -0.453932 |
| C  | 2.621075  | 0.783998  | -0.180620 |
| H  | -3.076621 | 1.749035  | -0.781175 |
| H  | 3.256166  | 1.652774  | -0.342684 |
| Os | -0.023115 | -0.434886 | 0.493579  |

**Reactant: H<sub>2</sub>O<sub>2</sub>**

|   |           |           |           |
|---|-----------|-----------|-----------|
| O | 0.196598  | 0.034102  | -0.761265 |
| H | -0.396258 | -0.703832 | -0.994168 |
| O | 0.149051  | -0.037216 | 0.689272  |
| H | -0.400662 | 0.743210  | 0.886811  |

**Reactant: C<sub>6</sub>H<sub>12</sub>**

|   |           |           |           |
|---|-----------|-----------|-----------|
| C | 0.505747  | 1.377467  | -0.233862 |
| C | -0.938010 | 1.126754  | 0.232036  |
| C | -1.445578 | -0.251127 | -0.224275 |
| C | -0.503249 | -1.377560 | 0.231390  |
| C | 0.940508  | -1.126847 | -0.234507 |
| C | 1.448076  | 0.251034  | 0.221805  |
| H | -2.460097 | -0.427327 | 0.156497  |
| H | -0.976245 | 1.179020  | 1.330607  |
| H | -1.600512 | 1.918408  | -0.141672 |
| H | 0.523963  | 1.440053  | -1.332402 |
| H | 0.862818  | 2.345885  | 0.140243  |
| H | 1.603009  | -1.918502 | 0.139198  |
| H | 0.978743  | -1.179110 | -1.333079 |
| H | 1.519160  | 0.263082  | 1.319913  |
| H | 2.462596  | 0.427234  | -0.158963 |
| H | -1.516665 | -0.263175 | -1.322382 |
| H | -0.521464 | -1.440148 | 1.329930  |
| H | -0.860321 | -2.345976 | -0.142717 |

**Reactant: CH<sub>3</sub>COOH**

|   |           |           |           |
|---|-----------|-----------|-----------|
| C | 0.136967  | 1.390136  | -0.001391 |
| H | 0.716399  | 1.671536  | -0.886834 |
| H | 0.728233  | 1.666019  | 0.877948  |
| H | -0.811821 | 1.927055  | 0.006666  |
| C | -0.119044 | -0.095355 | -0.004306 |
| O | 1.037689  | -0.799261 | -0.014388 |
| H | 0.793316  | -1.744887 | -0.015530 |
| O | -1.207800 | -0.631863 | 0.001724  |

**INT1:**

|   |           |           |           |
|---|-----------|-----------|-----------|
| N | -0.359098 | -0.326169 | -1.897013 |
| N | 0.585858  | -1.830656 | 0.280637  |
| N | 2.055667  | 0.155174  | -0.582692 |
| O | -1.836904 | -0.140684 | 0.542066  |
| O | 0.457398  | 1.139604  | 1.366413  |
| C | 2.020436  | -2.172763 | 0.006555  |
| C | 2.273597  | -3.609758 | -0.467552 |
| C | 2.548593  | -1.162907 | -1.040781 |
| H | 2.562354  | -1.992796 | 0.944943  |
| C | 3.776887  | -3.811815 | -0.739973 |
| H | 1.687957  | -3.797382 | -1.376979 |
| H | 1.948841  | -4.333422 | 0.286791  |
| C | 4.055336  | -1.331616 | -1.240088 |
| H | 2.041275  | -1.360948 | -1.993850 |
| C | 4.340642  | -2.768771 | -1.715399 |
| H | 3.934714  | -4.821429 | -1.134016 |
| H | 4.323633  | -3.756267 | 0.211185  |
| H | 4.418666  | -0.609839 | -1.980320 |
| H | 4.589813  | -1.142433 | -0.299762 |
| H | 5.421643  | -2.903913 | -1.826941 |
| H | 3.899500  | -2.915521 | -2.710099 |
| C | -2.327541 | -1.259816 | 1.080872  |
| C | -1.583056 | -2.470703 | 1.254780  |
| C | -3.660249 | -1.221692 | 1.536284  |
| C | -2.218167 | -3.584562 | 1.872766  |
| C | -4.246343 | -2.330851 | 2.126568  |

|    |           |           |           |
|----|-----------|-----------|-----------|
| H  | -4.219684 | -0.300946 | 1.414360  |
| C  | -3.527611 | -3.527751 | 2.299661  |
| H  | -1.642463 | -4.496437 | 2.004129  |
| H  | -5.276726 | -2.266433 | 2.463979  |
| H  | -3.994180 | -4.388820 | 2.765478  |
| C  | 1.291536  | 2.160708  | 1.427734  |
| C  | 2.465441  | 2.230694  | 0.611500  |
| C  | 1.051286  | 3.204437  | 2.348819  |
| C  | 3.351263  | 3.325241  | 0.749341  |
| C  | 1.921392  | 4.283161  | 2.434095  |
| H  | 0.170629  | 3.137360  | 2.979578  |
| C  | 3.076304  | 4.353980  | 1.631931  |
| H  | 4.251013  | 3.350913  | 0.140203  |
| H  | 1.708442  | 5.082252  | 3.138563  |
| H  | 3.749376  | 5.200558  | 1.715868  |
| C  | -0.216252 | -2.664869 | 0.884345  |
| C  | 2.848137  | 1.113390  | -0.198718 |
| H  | 0.205267  | -3.631846 | 1.152356  |
| H  | 3.902834  | 1.023775  | -0.454072 |
| Os | 0.002680  | 0.014969  | -0.305345 |
| O  | -0.597754 | 2.136327  | -0.936303 |
| H  | -1.337709 | 2.029527  | -1.632430 |
| C  | -5.037213 | 1.879901  | -2.781761 |
| H  | -5.698324 | 2.505476  | -2.173381 |
| H  | -5.554039 | 0.930716  | -2.956546 |
| H  | -4.827586 | 2.371359  | -3.731384 |
| C  | -3.755956 | 1.629781  | -2.038965 |
| O  | -3.946756 | 1.054265  | -0.858096 |
| O  | -2.649258 | 1.930079  | -2.489857 |
| O  | -1.346898 | 2.881187  | 0.060794  |
| H  | -0.676661 | 3.543874  | 0.317596  |
| H  | -3.098660 | 0.829777  | -0.397765 |

**TS1:**

|   |           |           |           |
|---|-----------|-----------|-----------|
| N | 0.434880  | 0.532026  | -1.978188 |
| N | -0.657437 | 1.720922  | 0.303658  |
| N | -1.999849 | -0.258688 | -0.765928 |
| O | 1.903748  | 0.149786  | 0.434519  |

|   |           |           |           |
|---|-----------|-----------|-----------|
| O | -0.445170 | -1.027728 | 1.394037  |
| C | -2.084164 | 2.030296  | -0.019290 |
| C | -2.366596 | 3.485501  | -0.416024 |
| C | -2.530315 | 1.070750  | -1.157321 |
| H | -2.667266 | 1.771407  | 0.874437  |
| C | -3.861538 | 3.656389  | -0.749376 |
| H | -1.745110 | 3.748517  | -1.281771 |
| H | -2.099761 | 4.168812  | 0.396914  |
| C | -4.035090 | 1.198618  | -1.398372 |
| H | -2.003036 | 1.353519  | -2.076370 |
| C | -4.348162 | 2.651806  | -1.804828 |
| H | -4.034740 | 4.680633  | -1.096628 |
| H | -4.449227 | 3.532679  | 0.170374  |
| H | -4.349245 | 0.506247  | -2.187465 |
| H | -4.595906 | 0.945414  | -0.489183 |
| H | -5.427593 | 2.759319  | -1.954906 |
| H | -3.872011 | 2.868369  | -2.770238 |
| C | 2.331644  | 1.276259  | 1.114938  |
| C | 1.452820  | 2.344797  | 1.427169  |
| C | 3.661969  | 1.304744  | 1.528899  |
| C | 1.979838  | 3.418389  | 2.186368  |
| C | 4.143675  | 2.385985  | 2.264577  |
| H | 4.316022  | 0.480418  | 1.269160  |
| C | 3.300830  | 3.448430  | 2.602792  |
| H | 1.318704  | 4.242446  | 2.437023  |
| H | 5.182781  | 2.389480  | 2.578279  |
| H | 3.672718  | 4.287251  | 3.180753  |
| C | -1.298415 | -2.019439 | 1.529278  |
| C | -2.413384 | -2.213617 | 0.641214  |
| C | -1.154067 | -2.919150 | 2.613776  |
| C | -3.309473 | -3.292688 | 0.863850  |
| C | -2.024199 | -3.982847 | 2.777120  |
| H | -0.327756 | -2.759194 | 3.299874  |
| C | -3.109897 | -4.183038 | 1.897260  |
| H | -4.158317 | -3.409430 | 0.195191  |
| H | -1.872737 | -4.670719 | 3.604457  |
| H | -3.787837 | -5.016782 | 2.045888  |
| C | 0.063027  | 2.500181  | 1.039399  |

|    |           |           |           |
|----|-----------|-----------|-----------|
| C  | -2.775541 | -1.207473 | -0.300198 |
| H  | -0.406348 | 3.407439  | 1.418647  |
| H  | -3.824945 | -1.155637 | -0.586040 |
| Os | 0.011332  | -0.096522 | -0.492956 |
| O  | 0.331423  | -2.038476 | -0.911586 |
| H  | 2.237334  | -2.181415 | -1.795851 |
| C  | 5.312979  | -1.601792 | -2.573323 |
| H  | 5.687335  | -2.629006 | -2.505023 |
| H  | 6.046472  | -0.913771 | -2.153966 |
| H  | 5.147195  | -1.383319 | -3.632408 |
| C  | 4.018718  | -1.496378 | -1.821837 |
| O  | 3.900267  | -0.822888 | -0.792449 |
| O  | 3.037430  | -2.195000 | -2.367072 |
| O  | 1.427231  | -2.559239 | -0.090717 |
| H  | 1.060884  | -2.457642 | 0.811051  |
| H  | 2.680584  | -0.375114 | -0.014605 |

**INT2:**

|   |           |           |           |
|---|-----------|-----------|-----------|
| N | -0.459623 | -0.560726 | -1.955053 |
| N | 0.636591  | -1.708993 | 0.324048  |
| N | 1.999074  | 0.238536  | -0.769809 |
| O | -1.883548 | -0.076767 | 0.430059  |
| O | 0.505727  | 0.985736  | 1.402096  |
| C | 2.046641  | -2.052008 | -0.026289 |
| C | 2.282229  | -3.509215 | -0.445301 |
| C | 2.507182  | -1.096110 | -1.160673 |
| H | 2.652632  | -1.822182 | 0.860352  |
| C | 3.771847  | -3.718430 | -0.780831 |
| H | 1.653163  | -3.738372 | -1.315383 |
| H | 1.991352  | -4.196702 | 0.356142  |
| C | 4.008369  | -1.255580 | -1.404981 |
| H | 1.972872  | -1.370409 | -2.078435 |
| C | 4.288691  | -2.712918 | -1.821980 |
| H | 3.918470  | -4.741986 | -1.142579 |
| H | 4.361667  | -3.623670 | 0.141167  |
| H | 4.337672  | -0.566438 | -2.190939 |
| H | 4.575476  | -1.017941 | -0.495362 |
| H | 5.365889  | -2.846449 | -1.968642 |

|    |           |           |           |
|----|-----------|-----------|-----------|
| H  | 3.811878  | -2.908024 | -2.791806 |
| C  | -2.235003 | -1.080784 | 1.258419  |
| C  | -1.406467 | -2.193068 | 1.600600  |
| C  | -3.517443 | -0.997883 | 1.830326  |
| C  | -1.918470 | -3.168980 | 2.495262  |
| C  | -3.985949 | -1.975090 | 2.698272  |
| H  | -4.136101 | -0.141238 | 1.583938  |
| C  | -3.185544 | -3.075519 | 3.038547  |
| H  | -1.282073 | -4.010982 | 2.752979  |
| H  | -4.981847 | -1.875577 | 3.120073  |
| H  | -3.550751 | -3.836896 | 3.719223  |
| C  | 1.309239  | 2.010405  | 1.493705  |
| C  | 2.415056  | 2.214615  | 0.591499  |
| C  | 1.150058  | 2.940942  | 2.554529  |
| C  | 3.286795  | 3.319250  | 0.780471  |
| C  | 1.993360  | 4.029070  | 2.681965  |
| H  | 0.330496  | 2.778884  | 3.247746  |
| C  | 3.071231  | 4.232354  | 1.790651  |
| H  | 4.129370  | 3.438690  | 0.103673  |
| H  | 1.829459  | 4.736819  | 3.490504  |
| H  | 3.729953  | 5.085649  | 1.914383  |
| C  | -0.063649 | -2.435563 | 1.134409  |
| C  | 2.784509  | 1.187468  | -0.325908 |
| H  | 0.404595  | -3.337814 | 1.528208  |
| H  | 3.834701  | 1.127404  | -0.609958 |
| Os | -0.032973 | 0.086381  | -0.475843 |
| O  | -0.296636 | 2.011185  | -0.951463 |
| H  | -2.534813 | 2.403262  | -1.377922 |
| C  | -5.059893 | 1.014124  | -3.061458 |
| H  | -5.402819 | 1.977968  | -3.438127 |
| H  | -5.881959 | 0.443056  | -2.626666 |
| H  | -4.648656 | 0.435651  | -3.898171 |
| C  | -3.977592 | 1.204888  | -2.055405 |
| O  | -3.799051 | 0.259656  | -1.206568 |
| O  | -3.286430 | 2.274214  | -2.112012 |
| O  | -1.531307 | 2.567346  | -0.353749 |
| H  | -1.264582 | 3.499530  | -0.238085 |
| H  | -3.003598 | 0.298323  | -0.538463 |



**TS2:**

|   |           |           |           |
|---|-----------|-----------|-----------|
| N | -0.498744 | -0.632111 | -1.899301 |
| N | 0.571841  | -1.679484 | 0.419399  |
| N | 1.989177  | 0.116631  | -0.821456 |
| O | -1.831055 | 0.066465  | 0.486277  |
| O | 0.616031  | 1.026728  | 1.372072  |
| C | 1.939037  | -2.130347 | 0.030362  |
| C | 2.064785  | -3.616726 | -0.329304 |
| C | 2.407345  | -1.259476 | -1.163944 |
| H | 2.595562  | -1.903031 | 0.880571  |
| C | 3.526402  | -3.930011 | -0.706118 |
| H | 1.390863  | -3.844119 | -1.165355 |
| H | 1.761750  | -4.247627 | 0.513030  |
| C | 3.885990  | -1.514995 | -1.455841 |
| H | 1.822878  | -1.543566 | -2.047763 |
| C | 4.062894  | -3.005299 | -1.810718 |
| H | 3.599136  | -4.975449 | -1.024735 |
| H | 4.154700  | -3.829698 | 0.189355  |
| H | 4.221169  | -0.884839 | -2.287332 |
| H | 4.501326  | -1.268704 | -0.580961 |
| H | 5.124222  | -3.210155 | -1.986983 |
| H | 3.540491  | -3.214723 | -2.753544 |
| C | -2.184422 | -0.814374 | 1.441705  |
| C | -1.407651 | -1.939307 | 1.848411  |
| C | -3.422715 | -0.584948 | 2.065674  |
| C | -1.921143 | -2.787907 | 2.863004  |
| C | -3.894844 | -1.438299 | 3.054250  |
| H | -3.998789 | 0.281566  | 1.758132  |
| C | -3.144402 | -2.552168 | 3.461310  |
| H | -1.324319 | -3.642769 | 3.168773  |
| H | -4.855369 | -1.232170 | 3.517320  |
| H | -3.515567 | -3.215634 | 4.234833  |
| C | 1.465065  | 2.016751  | 1.382850  |
| C | 2.540495  | 2.132135  | 0.426017  |
| C | 1.392577  | 2.997589  | 2.407548  |
| C | 3.465592  | 3.207118  | 0.527868  |
| C | 2.283749  | 4.052279  | 2.447264  |
| H | 0.597886  | 2.901821  | 3.140540  |

|    |           |           |           |
|----|-----------|-----------|-----------|
| C  | 3.329872  | 4.170911  | 1.501722  |
| H  | 4.282075  | 3.259675  | -0.187784 |
| H  | 2.184780  | 4.801826  | 3.228021  |
| H  | 4.026192  | 5.000904  | 1.559195  |
| C  | -0.115117 | -2.298088 | 1.326273  |
| C  | 2.833952  | 1.044969  | -0.443483 |
| H  | 0.330035  | -3.191755 | 1.764159  |
| H  | 3.869475  | 0.916835  | -0.757388 |
| Os | -0.050603 | 0.119360  | -0.472701 |
| O  | -0.189541 | 1.921379  | -0.992037 |
| H  | -2.310800 | 2.407107  | -1.245570 |
| C  | -5.081059 | 0.645923  | -3.261827 |
| H  | -5.188221 | 1.493975  | -3.937467 |
| H  | -6.030895 | 0.438755  | -2.759474 |
| H  | -4.808358 | -0.250181 | -3.829498 |
| C  | -4.017721 | 0.931145  | -2.241947 |
| O  | -3.890801 | -0.024467 | -1.335105 |
| O  | -3.332273 | 1.958294  | -2.263386 |
| O  | -1.638251 | 2.739336  | -0.527527 |
| H  | -1.329605 | 3.622911  | -0.812068 |
| H  | -3.155648 | 0.159281  | -0.692021 |

### **INT3:**

|   |           |           |           |
|---|-----------|-----------|-----------|
| N | 0.860082  | 0.407609  | -2.069272 |
| N | 0.916358  | 1.066054  | 0.536230  |
| N | -1.424153 | 0.826936  | -0.613038 |
| O | 1.600778  | -1.548660 | -0.237292 |
| O | -0.814856 | -1.351040 | 0.957100  |
| C | -0.018893 | 2.193652  | 0.759876  |
| C | 0.629280  | 3.565996  | 0.986353  |
| C | -0.967748 | 2.227311  | -0.472135 |
| H | -0.632014 | 1.927632  | 1.630855  |
| C | -0.447546 | 4.661266  | 1.094787  |
| H | 1.310619  | 3.785504  | 0.153910  |
| H | 1.223289  | 3.557893  | 1.906158  |
| C | -2.055881 | 3.288802  | -0.304927 |
| H | -0.371171 | 2.452562  | -1.365083 |
| C | -1.392300 | 4.664359  | -0.113694 |

|    |           |           |           |
|----|-----------|-----------|-----------|
| H  | 0.045989  | 5.633854  | 1.193191  |
| H  | -1.029279 | 4.508377  | 2.013854  |
| H  | -2.708964 | 3.295114  | -1.184394 |
| H  | -2.675639 | 3.065752  | 0.572805  |
| H  | -2.172471 | 5.421377  | 0.017657  |
| H  | -0.837338 | 4.934805  | -1.021725 |
| C  | 2.841209  | -1.201273 | 0.155769  |
| C  | 3.126178  | 0.052425  | 0.752864  |
| C  | 3.846595  | -2.167822 | 0.028128  |
| C  | 4.442043  | 0.300807  | 1.205171  |
| C  | 5.135524  | -1.883447 | 0.466515  |
| H  | 3.596446  | -3.124428 | -0.417125 |
| C  | 5.440828  | -0.647202 | 1.056658  |
| H  | 4.659933  | 1.256954  | 1.672271  |
| H  | 5.911150  | -2.634344 | 0.350968  |
| H  | 6.448211  | -0.438300 | 1.399988  |
| C  | -2.073869 | -1.617692 | 0.958724  |
| C  | -3.042037 | -0.804508 | 0.229483  |
| C  | -2.575960 | -2.698774 | 1.742245  |
| C  | -4.432313 | -1.131895 | 0.296254  |
| C  | -3.916495 | -3.000682 | 1.739350  |
| H  | -1.858479 | -3.289090 | 2.301846  |
| C  | -4.860363 | -2.219913 | 1.009141  |
| H  | -5.140385 | -0.504122 | -0.236617 |
| H  | -4.270760 | -3.852264 | 2.313271  |
| H  | -5.912439 | -2.481577 | 1.038874  |
| C  | 2.132839  | 1.074431  | 0.971021  |
| C  | -2.653772 | 0.444833  | -0.279870 |
| H  | 2.466868  | 1.929950  | 1.557016  |
| H  | -3.418384 | 1.213032  | -0.377856 |
| Os | 0.111175  | -0.481436 | -0.851347 |
| O  | -0.847722 | -1.697527 | -1.655455 |

**TS3:**

|   |           |           |           |
|---|-----------|-----------|-----------|
| N | -0.784253 | 0.680597  | -2.132259 |
| N | -2.040349 | 0.947399  | 0.282636  |
| N | -1.604915 | -1.478951 | -0.610395 |
| O | 0.771534  | 1.613649  | 0.037820  |

|   |           |           |           |
|---|-----------|-----------|-----------|
| O | 0.090182  | -0.704601 | 1.385685  |
| C | -3.227197 | 0.047742  | 0.275746  |
| C | -4.582241 | 0.740676  | 0.081097  |
| C | -2.989039 | -1.010685 | -0.837849 |
| H | -3.220110 | -0.484323 | 1.236242  |
| C | -5.711407 | -0.305269 | 0.017261  |
| H | -4.556462 | 1.331547  | -0.843822 |
| H | -4.784018 | 1.431074  | 0.906621  |
| C | -4.092870 | -2.068881 | -0.834713 |
| H | -2.989222 | -0.496098 | -1.806720 |
| C | -5.452311 | -1.378572 | -1.048893 |
| H | -6.658574 | 0.206704  | -0.183691 |
| H | -5.814851 | -0.783957 | 1.000586  |
| H | -3.907358 | -2.802215 | -1.627289 |
| H | -4.106739 | -2.607958 | 0.121189  |
| H | -6.246144 | -2.132661 | -1.025079 |
| H | -5.477558 | -0.924103 | -2.048324 |
| C | 0.349410  | 2.811967  | 0.461836  |
| C | -1.000330 | 3.101676  | 0.812057  |
| C | 1.326071  | 3.812484  | 0.601222  |
| C | -1.314662 | 4.398464  | 1.290015  |
| C | 0.979588  | 5.076066  | 1.060653  |
| H | 2.350152  | 3.569840  | 0.338632  |
| C | -0.347378 | 5.379205  | 1.408006  |
| H | -2.344244 | 4.613078  | 1.562948  |
| H | 1.750107  | 5.835797  | 1.153321  |
| H | -0.609035 | 6.367953  | 1.769034  |
| C | 0.391254  | -1.956630 | 1.511032  |
| C | -0.204903 | -2.990858 | 0.682727  |
| C | 1.286054  | -2.376722 | 2.537962  |
| C | 0.133291  | -4.357606 | 0.902143  |
| C | 1.620610  | -3.704706 | 2.685376  |
| H | 1.714891  | -1.609601 | 3.174344  |
| C | 1.049978  | -4.711925 | 1.861641  |
| H | -0.341940 | -5.116421 | 0.286284  |
| H | 2.331205  | -3.991696 | 3.455817  |
| H | 1.323577  | -5.751363 | 2.008083  |
| C | -2.081063 | 2.152425  | 0.755678  |

|    |           |           |           |
|----|-----------|-----------|-----------|
| C  | -1.326287 | -2.668885 | -0.119363 |
| H  | -3.029065 | 2.506037  | 1.158587  |
| H  | -2.070003 | -3.446230 | -0.288548 |
| Os | -0.298300 | 0.109819  | -0.634493 |
| O  | 1.167429  | -0.902021 | -1.023426 |
| C  | 4.034229  | 0.077096  | 0.521612  |
| C  | 5.534567  | 0.483805  | 0.526218  |
| C  | 6.344015  | -0.362165 | -0.464756 |
| C  | 5.759997  | -0.284526 | -1.881157 |
| C  | 4.261254  | -0.696737 | -1.894239 |
| C  | 3.508599  | 0.159644  | -0.896656 |
| H  | 7.388869  | -0.025873 | -0.474510 |
| H  | 5.619893  | 1.546468  | 0.261516  |
| H  | 5.924837  | 0.375829  | 1.545662  |
| H  | 3.943290  | -0.950942 | 0.895211  |
| H  | 3.460970  | 0.727000  | 1.189944  |
| H  | 3.848418  | -0.584661 | -2.902548 |
| H  | 4.181289  | -1.755225 | -1.614993 |
| H  | 3.372763  | 1.190302  | -1.242188 |
| H  | 2.377535  | -0.280288 | -0.887916 |
| H  | 6.352495  | -1.409001 | -0.129821 |
| H  | 5.853894  | 0.739967  | -2.265669 |
| H  | 6.310026  | -0.937248 | -2.569903 |

**INT4:**

|   |           |           |           |
|---|-----------|-----------|-----------|
| N | 0.384445  | -0.297081 | -1.961841 |
| N | 2.173200  | 0.616040  | -0.017337 |
| N | -0.195544 | 1.708076  | -0.058454 |
| O | 1.076068  | -2.100198 | 0.169672  |
| O | -0.341911 | -0.404319 | 1.691064  |
| C | 2.171238  | 2.113733  | -0.067258 |
| C | 3.349366  | 2.747224  | -0.820005 |
| C | 0.833383  | 2.552845  | -0.708413 |
| H | 2.171867  | 2.462145  | 0.974436  |
| C | 3.201444  | 4.280970  | -0.822645 |
| H | 3.371018  | 2.360496  | -1.847273 |
| H | 4.301991  | 2.481978  | -0.350599 |
| C | 0.671652  | 4.071304  | -0.630598 |

|    |           |           |           |
|----|-----------|-----------|-----------|
| H  | 0.846468  | 2.254655  | -1.764253 |
| C  | 1.843759  | 4.737413  | -1.376043 |
| H  | 4.014971  | 4.716962  | -1.412268 |
| H  | 3.322088  | 4.653830  | 0.203611  |
| H  | -0.282147 | 4.370897  | -1.079521 |
| H  | 0.666251  | 4.404016  | 0.415276  |
| H  | 1.751280  | 5.825671  | -1.295274 |
| H  | 1.778704  | 4.493129  | -2.444588 |
| C  | 2.357917  | -2.417882 | 0.273283  |
| C  | 3.434115  | -1.472055 | 0.294235  |
| C  | 2.666377  | -3.788359 | 0.408519  |
| C  | 4.766641  | -1.947057 | 0.454391  |
| C  | 3.976760  | -4.212846 | 0.550968  |
| H  | 1.843095  | -4.494826 | 0.396661  |
| C  | 5.043132  | -3.291572 | 0.574895  |
| H  | 5.574223  | -1.220223 | 0.475619  |
| H  | 4.181805  | -5.275185 | 0.648534  |
| H  | 6.065010  | -3.636531 | 0.689490  |
| C  | -1.382016 | 0.218045  | 2.210430  |
| C  | -1.847681 | 1.480833  | 1.719569  |
| C  | -2.048474 | -0.351841 | 3.320337  |
| C  | -2.949850 | 2.115388  | 2.346392  |
| C  | -3.143221 | 0.279129  | 3.890335  |
| H  | -1.680807 | -1.298580 | 3.703285  |
| C  | -3.607750 | 1.517872  | 3.403428  |
| H  | -3.274890 | 3.084054  | 1.975500  |
| H  | -3.646422 | -0.187956 | 4.732387  |
| H  | -4.461532 | 2.002151  | 3.865312  |
| C  | 3.272090  | -0.057612 | 0.198807  |
| C  | -1.098195 | 2.204938  | 0.739706  |
| H  | 4.180454  | 0.528061  | 0.325775  |
| H  | -1.251210 | 3.282710  | 0.705682  |
| Os | 0.377097  | -0.280274 | -0.297689 |
| O  | -1.563807 | -1.419571 | -0.440757 |
| C  | -2.866024 | -1.160319 | -2.480492 |
| C  | -4.215830 | -0.714176 | -3.072418 |
| C  | -5.394718 | -1.412077 | -2.377072 |
| C  | -5.348359 | -1.204008 | -0.855649 |

|   |           |           |           |
|---|-----------|-----------|-----------|
| C | -3.995211 | -1.646973 | -0.268806 |
| C | -2.848308 | -0.925748 | -0.973833 |
| H | -6.344551 | -1.038035 | -2.777532 |
| H | -4.319935 | 0.375030  | -2.963793 |
| H | -4.226021 | -0.922440 | -4.148289 |
| H | -2.710629 | -2.231320 | -2.666223 |
| H | -2.037889 | -0.623928 | -2.955351 |
| H | -3.963131 | -1.443245 | 0.810000  |
| H | -3.868057 | -2.729552 | -0.406494 |
| H | -2.893924 | 0.147263  | -0.755575 |
| H | -1.690623 | -1.749743 | 0.467733  |
| H | -5.360467 | -2.488422 | -2.597472 |
| H | -5.512436 | -0.141946 | -0.624988 |
| H | -6.154832 | -1.759855 | -0.364239 |

**Product: H<sub>2</sub>O**

|   |          |           |           |
|---|----------|-----------|-----------|
| O | 0.000000 | 0.000000  | -0.142354 |
| H | 0.000000 | -0.760425 | 0.459018  |
| H | 0.000000 | 0.760425  | 0.459018  |

**Product: C<sub>6</sub>H<sub>11</sub>OH**

|   |           |           |           |
|---|-----------|-----------|-----------|
| C | -1.159297 | -1.268827 | -0.208856 |
| C | 0.332563  | -1.265206 | 0.165983  |
| C | 1.040913  | -0.000005 | -0.335225 |
| C | 0.332597  | 1.265251  | 0.165886  |
| C | -1.159266 | 1.268883  | -0.208945 |
| C | -1.867579 | 0.000054  | 0.291373  |
| H | 0.433415  | -1.308523 | 1.262174  |
| H | 0.840900  | -2.150081 | -0.236058 |
| H | -1.256515 | -1.329850 | -1.302802 |
| H | -1.645872 | -2.164483 | 0.197068  |
| H | 0.433452  | 1.308649  | 1.262074  |
| H | 0.840953  | 2.150084  | -0.236223 |
| H | -1.645814 | 2.164579  | 0.196922  |
| H | -1.256488 | 1.329835  | -1.302894 |
| H | -1.875499 | 0.000092  | 1.391464  |
| H | -2.916859 | 0.000057  | -0.030077 |
| H | 1.028576  | -0.000046 | -1.433424 |

|   |          |           |          |
|---|----------|-----------|----------|
| O | 2.432353 | -0.000013 | 0.002040 |
| H | 2.490730 | 0.000170  | 0.972093 |

**The Cartesian coordinate of all the structures on Scheme S1, S2, and S3**

**Reactant: FeCl<sub>3</sub>**

|    |           |           |           |
|----|-----------|-----------|-----------|
| Fe | 0.035131  | -0.020283 | -0.180547 |
| Cl | 1.936374  | -1.117958 | 0.086100  |
| Cl | -0.063854 | 2.165878  | 0.091186  |
| Cl | -1.907652 | -1.027637 | 0.091185  |

**INT1a**

|   |           |           |           |
|---|-----------|-----------|-----------|
| N | 0.751133  | 0.513979  | -0.613009 |
| N | -0.695291 | 0.911536  | 1.738403  |
| N | -2.033692 | 0.866699  | -0.502304 |
| O | 0.601738  | -1.679205 | 1.200362  |
| O | -2.007115 | -1.597597 | 0.532044  |
| C | -1.615053 | 2.080264  | 1.522075  |
| C | -1.155347 | 3.404362  | 2.146845  |
| C | -1.800395 | 2.244308  | -0.006058 |
| H | -2.583634 | 1.786413  | 1.948470  |
| C | -2.166399 | 4.517974  | 1.809204  |
| H | -0.160391 | 3.658210  | 1.760886  |
| H | -1.077610 | 3.316188  | 3.235179  |
| C | -2.863235 | 3.298929  | -0.312760 |
| H | -0.845302 | 2.567733  | -0.436046 |
| C | -2.421242 | 4.641139  | 0.300549  |
| H | -1.791017 | 5.466758  | 2.206734  |
| H | -3.113814 | 4.312701  | 2.325625  |
| H | -2.986750 | 3.402289  | -1.396665 |
| H | -3.832205 | 3.000680  | 0.108740  |
| H | -3.192562 | 5.394563  | 0.109852  |
| H | -1.509170 | 4.986168  | -0.203247 |
| C | 1.108558  | -1.473692 | 2.420128  |
| C | 0.818570  | -0.328187 | 3.230626  |
| C | 1.955923  | -2.470168 | 2.938424  |
| C | 1.410790  | -0.233752 | 4.521611  |



|    |           |           |           |
|----|-----------|-----------|-----------|
| C  | 2.521318  | -2.336918 | 4.197903  |
| H  | 2.164819  | -3.341847 | 2.328890  |
| C  | 2.254210  | -1.212876 | 5.001236  |
| H  | 1.184687  | 0.636659  | 5.130754  |
| H  | 3.177672  | -3.119439 | 4.566688  |
| H  | 2.700957  | -1.121405 | 5.984978  |
| C  | -3.067906 | -1.856571 | -0.219874 |
| C  | -3.627213 | -0.867708 | -1.087693 |
| C  | -3.690110 | -3.115818 | -0.120370 |
| C  | -4.784819 | -1.178389 | -1.836577 |
| C  | -4.808608 | -3.399345 | -0.890768 |
| H  | -3.264720 | -3.849309 | 0.555745  |
| C  | -5.357912 | -2.435905 | -1.759147 |
| H  | -5.218438 | -0.415145 | -2.476292 |
| H  | -5.269470 | -4.379871 | -0.818336 |
| H  | -6.235423 | -2.673856 | -2.350598 |
| C  | -0.056294 | 0.736855  | 2.866962  |
| C  | -3.164957 | 0.485817  | -1.022698 |
| H  | -0.216347 | 1.495022  | 3.629731  |
| H  | -3.852940 | 1.263040  | -1.350285 |
| Os | -0.493854 | -0.333655 | 0.176077  |
| O  | -0.332339 | -1.719910 | -1.617601 |
| H  | 0.660620  | -1.758547 | -1.887258 |
| C  | 4.214049  | -3.232883 | -1.992162 |
| H  | 4.426295  | -4.227459 | -1.593557 |
| H  | 4.984428  | -2.547123 | -1.619947 |
| H  | 4.243688  | -3.236431 | -3.081977 |
| C  | 2.877750  | -2.745150 | -1.518990 |
| O  | 2.598104  | -3.101676 | -0.271718 |
| O  | 2.128459  | -2.059635 | -2.220517 |
| O  | -0.540041 | -3.117908 | -1.286437 |
| H  | -1.082140 | -3.395179 | -2.050616 |
| H  | 1.759810  | -2.696028 | 0.054927  |
| Fe | 2.247867  | 1.601938  | -1.493970 |
| Cl | 1.930310  | 1.606883  | -3.689659 |
| Cl | 1.857074  | 3.647495  | -0.658314 |
| Cl | 4.140952  | 0.758026  | -0.675702 |

**TS1a**

|   |           |           |           |
|---|-----------|-----------|-----------|
| N | 0.911452  | 0.509723  | -0.632664 |
| N | -0.664033 | 0.950753  | 1.606285  |
| N | -1.867782 | 1.098493  | -0.710914 |
| O | 0.451496  | -1.754228 | 0.979015  |
| O | -2.201106 | -1.240716 | 0.569506  |
| C | -1.414392 | 2.220975  | 1.368513  |
| C | -0.823450 | 3.472547  | 2.031971  |
| C | -1.512645 | 2.432488  | -0.167408 |
| H | -2.433220 | 2.054779  | 1.743687  |
| C | -1.688143 | 4.700401  | 1.686009  |
| H | 0.206932  | 3.613972  | 1.682550  |
| H | -0.786336 | 3.353811  | 3.119787  |
| C | -2.443083 | 3.602384  | -0.486849 |
| H | -0.512298 | 2.663620  | -0.550969 |
| C | -1.879063 | 4.876345  | 0.172134  |
| H | -1.222957 | 5.595405  | 2.112577  |
| H | -2.669278 | 4.594534  | 2.168942  |
| H | -2.516330 | 3.738379  | -1.571715 |
| H | -3.453395 | 3.406128  | -0.104586 |
| H | -2.556650 | 5.713532  | -0.026175 |
| H | -0.918585 | 5.129053  | -0.295554 |
| C | 0.781558  | -1.690636 | 2.282135  |
| C | 0.493260  | -0.582546 | 3.140483  |
| C | 1.435589  | -2.811014 | 2.824235  |
| C | 0.898549  | -0.655865 | 4.499612  |
| C | 1.820663  | -2.842016 | 4.157818  |
| H | 1.635454  | -3.658816 | 2.178278  |
| C | 1.556283  | -1.758242 | 5.009171  |
| H | 0.678442  | 0.188385  | 5.146593  |
| H | 2.327912  | -3.722423 | 4.540949  |
| H | 1.857783  | -1.786513 | 6.050447  |
| C | -3.263737 | -1.420486 | -0.184732 |
| C | -3.668461 | -0.460339 | -1.175003 |
| C | -4.073534 | -2.561844 | 0.017119  |
| C | -4.845839 | -0.688154 | -1.928521 |
| C | -5.194560 | -2.773339 | -0.767113 |
| H | -3.775032 | -3.270951 | 0.782206  |

|    |           |           |           |
|----|-----------|-----------|-----------|
| C  | -5.586236 | -1.840291 | -1.751820 |
| H  | -5.154218 | 0.058976  | -2.654616 |
| H  | -5.788023 | -3.670354 | -0.615189 |
| H  | -6.473758 | -2.019754 | -2.349132 |
| C  | -0.196865 | 0.624235  | 2.773377  |
| C  | -3.048508 | 0.826283  | -1.200788 |
| H  | -0.344353 | 1.336914  | 3.583580  |
| H  | -3.647381 | 1.665325  | -1.551357 |
| Os | -0.489136 | -0.266499 | -0.044533 |
| O  | -0.754179 | -1.487120 | -1.639278 |
| H  | 0.781163  | -2.401227 | -2.208586 |
| C  | 3.739972  | -3.761367 | -2.044737 |
| H  | 4.071693  | -4.513903 | -1.328467 |
| H  | 4.476324  | -2.947629 | -2.061596 |
| H  | 3.658420  | -4.174774 | -3.050555 |
| C  | 2.441554  | -3.183355 | -1.616116 |
| O  | 2.185013  | -3.164926 | -0.362537 |
| O  | 1.669947  | -2.719509 | -2.531419 |
| O  | -0.699831 | -2.907083 | -1.247804 |
| H  | -1.448415 | -3.253555 | -1.768762 |
| H  | 1.363564  | -2.676535 | 0.004127  |
| Fe | 2.609230  | 1.497238  | -1.109473 |
| Cl | 1.918390  | 3.298178  | -2.235692 |
| Cl | 3.421864  | 1.940074  | 0.931055  |
| Cl | 3.891231  | 0.069293  | -2.257798 |

### **INT2a**

|   |           |           |           |
|---|-----------|-----------|-----------|
| N | 0.857282  | 0.771464  | -0.412307 |
| N | -0.976870 | 0.721613  | 1.674619  |
| N | -1.968908 | 1.009397  | -0.726289 |
| O | 0.559624  | -1.717908 | 0.878492  |
| O | -2.085139 | -1.499948 | 0.263912  |
| C | -1.844771 | 1.924287  | 1.496012  |
| C | -1.462142 | 3.147643  | 2.340130  |
| C | -1.836868 | 2.301956  | -0.010481 |
| H | -2.866088 | 1.609500  | 1.749643  |
| C | -2.438075 | 4.303826  | 2.045950  |
| H | -0.431542 | 3.441807  | 2.104408  |

|    |           |           |           |
|----|-----------|-----------|-----------|
| H  | -1.497295 | 2.907903  | 3.407891  |
| C  | -2.878843 | 3.384259  | -0.291010 |
| H  | -0.844458 | 2.691849  | -0.265713 |
| C  | -2.530184 | 4.629947  | 0.547360  |
| H  | -2.119992 | 5.190519  | 2.604470  |
| H  | -3.434309 | 4.034629  | 2.422610  |
| H  | -2.883895 | 3.634326  | -1.357764 |
| H  | -3.883281 | 3.030143  | -0.024320 |
| H  | -3.288870 | 5.401164  | 0.377632  |
| H  | -1.575194 | 5.043884  | 0.198080  |
| C  | 0.661490  | -1.826915 | 2.217743  |
| C  | 0.125046  | -0.894174 | 3.159427  |
| C  | 1.342098  | -2.957367 | 2.703388  |
| C  | 0.324515  | -1.138403 | 4.543998  |
| C  | 1.520693  | -3.159713 | 4.065337  |
| H  | 1.727872  | -3.676289 | 1.988701  |
| C  | 1.013339  | -2.245189 | 5.000670  |
| H  | -0.084766 | -0.426148 | 5.254549  |
| H  | 2.055505  | -4.042356 | 4.403170  |
| H  | 1.153119  | -2.406594 | 6.063858  |
| C  | -3.047854 | -1.716934 | -0.604111 |
| C  | -3.506239 | -0.698240 | -1.511312 |
| C  | -3.706447 | -2.968840 | -0.611481 |
| C  | -4.583214 | -0.978203 | -2.388803 |
| C  | -4.725869 | -3.220797 | -1.512529 |
| H  | -3.371628 | -3.725146 | 0.090921  |
| C  | -5.169174 | -2.227714 | -2.413659 |
| H  | -4.936778 | -0.192248 | -3.050350 |
| H  | -5.199574 | -4.198302 | -1.520028 |
| H  | -5.977189 | -2.441644 | -3.105070 |
| C  | -0.636034 | 0.285101  | 2.848039  |
| C  | -3.065096 | 0.649056  | -1.342438 |
| H  | -0.971222 | 0.861629  | 3.709681  |
| H  | -3.741793 | 1.443765  | -1.652895 |
| Os | -0.478533 | -0.237878 | -0.085863 |
| O  | -0.493320 | -1.197556 | -1.827266 |
| H  | 1.406607  | -2.686108 | -2.058568 |
| C  | 4.680686  | -2.789550 | -1.576213 |

|    |           |           |           |
|----|-----------|-----------|-----------|
| H  | 4.842365  | -3.503667 | -2.384761 |
| H  | 5.212111  | -3.083693 | -0.670560 |
| H  | 5.054685  | -1.809718 | -1.899512 |
| C  | 3.227329  | -2.645024 | -1.302156 |
| O  | 2.881733  | -2.338569 | -0.103546 |
| O  | 2.413532  | -2.813868 | -2.270313 |
| O  | -0.062406 | -2.594784 | -1.708074 |
| H  | -0.618689 | -3.011573 | -2.394826 |
| H  | 1.895229  | -2.183585 | 0.120006  |
| Fe | 2.537824  | 1.766930  | -0.907815 |
| Cl | 3.289410  | 0.640489  | -2.697172 |
| Cl | 1.973669  | 3.878099  | -1.364008 |
| Cl | 3.847811  | 1.544010  | 0.883331  |

### **TS2a**

|   |           |           |           |
|---|-----------|-----------|-----------|
| N | 0.956312  | 0.687892  | -0.245398 |
| N | -0.975412 | 0.485313  | 1.748365  |
| N | -1.783009 | 1.232984  | -0.608802 |
| O | 0.358278  | -1.906782 | 0.663919  |
| O | -2.232659 | -1.358935 | 0.029777  |
| C | -1.703045 | 1.787678  | 1.724341  |
| C | -1.241541 | 2.820636  | 2.761469  |
| C | -1.562981 | 2.380678  | 0.300128  |
| H | -2.763861 | 1.552588  | 1.883711  |
| C | -2.075918 | 4.107800  | 2.607918  |
| H | -0.175576 | 3.031923  | 2.610548  |
| H | -1.357037 | 2.429406  | 3.777445  |
| C | -2.464801 | 3.603611  | 0.136202  |
| H | -0.522656 | 2.690749  | 0.152327  |
| C | -2.042313 | 4.662029  | 1.175081  |
| H | -1.701420 | 4.860588  | 3.309517  |
| H | -3.115201 | 3.897962  | 2.895710  |
| H | -2.367722 | 4.007192  | -0.877596 |
| H | -3.517369 | 3.334235  | 0.291409  |
| H | -2.706381 | 5.528782  | 1.092775  |
| H | -1.030413 | 5.014842  | 0.937703  |
| C | 0.311967  | -2.279144 | 1.957488  |
| C | -0.209996 | -1.474681 | 3.012979  |

|    |           |           |           |
|----|-----------|-----------|-----------|
| C  | 0.827240  | -3.550593 | 2.255388  |
| C  | -0.175319 | -1.986398 | 4.334712  |
| C  | 0.847690  | -4.018114 | 3.563526  |
| H  | 1.209193  | -4.157257 | 1.441516  |
| C  | 0.346639  | -3.235860 | 4.615413  |
| H  | -0.573824 | -1.371987 | 5.136780  |
| H  | 1.253663  | -5.004458 | 3.766353  |
| H  | 0.363701  | -3.606924 | 5.634210  |
| C  | -3.148798 | -1.350799 | -0.910136 |
| C  | -3.429602 | -0.177314 | -1.700634 |
| C  | -3.942374 | -2.503722 | -1.117361 |
| C  | -4.465117 | -0.217427 | -2.670471 |
| C  | -4.911785 | -2.518726 | -2.103154 |
| H  | -3.744275 | -3.375900 | -0.503406 |
| C  | -5.177102 | -1.376237 | -2.893617 |
| H  | -4.681240 | 0.680983  | -3.241559 |
| H  | -5.487239 | -3.425116 | -2.267904 |
| H  | -5.949982 | -1.408968 | -3.653914 |
| C  | -0.804262 | -0.176751 | 2.850892  |
| C  | -2.876096 | 1.075842  | -1.313591 |
| H  | -1.164747 | 0.287149  | 3.768590  |
| H  | -3.448788 | 1.975316  | -1.533911 |
| Os | -0.454171 | -0.271840 | -0.146816 |
| O  | -0.518641 | -0.929753 | -1.868552 |
| H  | 1.022423  | -2.604043 | -2.132018 |
| C  | 4.853829  | -2.745685 | -1.548476 |
| H  | 5.039212  | -3.218058 | -2.512972 |
| H  | 5.310998  | -3.322622 | -0.740487 |
| H  | 5.303705  | -1.746406 | -1.543244 |
| C  | 3.378443  | -2.606127 | -1.323186 |
| O  | 3.062552  | -2.297050 | -0.070127 |
| O  | 2.544206  | -2.750921 | -2.218695 |
| O  | -0.010022 | -2.635213 | -2.103745 |
| H  | -0.313558 | -2.652114 | -3.033233 |
| H  | 2.086683  | -2.196915 | 0.039180  |
| Fe | 2.616326  | 1.812797  | -0.680875 |
| Cl | 3.394658  | 0.765688  | -2.484254 |
| Cl | 1.793040  | 3.844551  | -1.114611 |

|    |          |          |          |
|----|----------|----------|----------|
| Cl | 3.900580 | 1.812580 | 1.137337 |
|----|----------|----------|----------|

**INT3a**

|   |           |           |           |
|---|-----------|-----------|-----------|
| N | -0.880622 | -0.222338 | -0.915863 |
| N | 0.015901  | 0.063281  | 1.588355  |
| N | 1.588144  | -1.178720 | -0.097101 |
| O | -0.126339 | 2.287652  | -0.111484 |
| O | 2.341417  | 1.401579  | 0.353254  |
| C | 0.592341  | -1.210718 | 2.077192  |
| C | -0.250904 | -1.977687 | 3.105033  |
| C | 0.854547  | -2.082313 | 0.813668  |
| H | 1.571250  | -0.967502 | 2.510793  |
| C | 0.393699  | -3.337381 | 3.433647  |
| H | -1.261838 | -2.125003 | 2.704835  |
| H | -0.338479 | -1.392885 | 4.026969  |
| C | 1.553134  | -3.392922 | 1.178901  |
| H | -0.106666 | -2.302423 | 0.334236  |
| C | 0.672766  | -4.168384 | 2.174948  |
| H | -0.271275 | -3.885529 | 4.109105  |
| H | 1.332179  | -3.174035 | 3.979863  |
| H | 1.724893  | -3.986743 | 0.274592  |
| H | 2.527656  | -3.190711 | 1.641902  |
| H | 1.178564  | -5.101704 | 2.442751  |
| H | -0.271675 | -4.447556 | 1.690043  |
| C | -1.146739 | 2.674723  | 0.676249  |
| C | -1.549670 | 1.923556  | 1.811280  |
| C | -1.756856 | 3.899003  | 0.374819  |
| C | -2.598065 | 2.430005  | 2.610538  |
| C | -2.801032 | 4.354969  | 1.171098  |
| H | -1.410723 | 4.458347  | -0.487011 |
| C | -3.228207 | 3.621992  | 2.290345  |
| H | -2.908000 | 1.864715  | 3.484236  |
| H | -3.287386 | 5.292463  | 0.920562  |
| H | -4.040297 | 3.991238  | 2.906836  |
| C | 3.517680  | 1.063764  | -0.086374 |
| C | 3.799558  | -0.270897 | -0.592001 |
| C | 4.585682  | 1.994027  | -0.016210 |
| C | 5.114484  | -0.585458 | -1.048585 |

|    |           |           |           |
|----|-----------|-----------|-----------|
| C  | 5.829417  | 1.658177  | -0.505321 |
| H  | 4.378327  | 2.977792  | 0.389921  |
| C  | 6.102483  | 0.365946  | -1.034371 |
| H  | 5.314011  | -1.588849 | -1.412152 |
| H  | 6.624882  | 2.397147  | -0.482251 |
| H  | 7.095528  | 0.134566  | -1.403296 |
| C  | -0.897273 | 0.710381  | 2.236016  |
| C  | 2.886462  | -1.311360 | -0.336985 |
| H  | -1.219693 | 0.321470  | 3.200615  |
| H  | 3.275381  | -2.324947 | -0.263402 |
| Os | 0.594793  | 0.553304  | -0.504080 |
| Fe | -2.727365 | -1.091336 | -1.306243 |
| Cl | -3.729704 | 0.550947  | -2.412880 |
| Cl | -2.086930 | -2.878000 | -2.464769 |
| Cl | -3.507016 | -1.520917 | 0.745092  |
| O  | 1.434620  | 0.810418  | -2.001057 |

**TS3a**

|   |           |           |           |
|---|-----------|-----------|-----------|
| N | 0.740161  | -0.818395 | -0.750605 |
| N | 1.545749  | 0.576368  | 1.451865  |
| N | 0.916500  | 1.944021  | -0.696662 |
| O | -1.016810 | -0.739114 | 1.439403  |
| O | -0.953124 | 1.971550  | 1.255008  |
| C | 2.558035  | 1.576710  | 1.011040  |
| C | 4.016976  | 1.231940  | 1.338725  |
| C | 2.375111  | 1.767771  | -0.521531 |
| H | 2.285710  | 2.525667  | 1.491866  |
| C | 4.961450  | 2.304248  | 0.762145  |
| H | 4.255985  | 0.245585  | 0.921729  |
| H | 4.162803  | 1.177895  | 2.422574  |
| C | 3.274959  | 2.887221  | -1.045359 |
| H | 2.639224  | 0.829836  | -1.024317 |
| C | 4.741614  | 2.531700  | -0.739375 |
| H | 5.996285  | 1.999872  | 0.950795  |
| H | 4.807626  | 3.248706  | 1.301185  |
| H | 3.128002  | 3.009131  | -2.124264 |
| H | 3.023648  | 3.839817  | -0.560896 |
| H | 5.387092  | 3.340995  | -1.096232 |



|    |           |           |           |
|----|-----------|-----------|-----------|
| H  | 5.023763  | 1.631062  | -1.300052 |
| C  | -0.513558 | -1.381032 | 2.503091  |
| C  | 0.787434  | -1.136735 | 3.028714  |
| C  | -1.355681 | -2.313736 | 3.128971  |
| C  | 1.200356  | -1.865068 | 4.170107  |
| C  | -0.910535 | -3.020412 | 4.238464  |
| H  | -2.346429 | -2.471525 | 2.717470  |
| C  | 0.373142  | -2.801564 | 4.765032  |
| H  | 2.190024  | -1.677285 | 4.575953  |
| H  | -1.569046 | -3.748250 | 4.702481  |
| H  | 0.711083  | -3.356087 | 5.633557  |
| C  | -1.475149 | 2.997772  | 0.641267  |
| C  | -0.919724 | 3.528863  | -0.588424 |
| C  | -2.580745 | 3.672880  | 1.218808  |
| C  | -1.509375 | 4.675836  | -1.190006 |
| C  | -3.151486 | 4.753073  | 0.577699  |
| H  | -2.978074 | 3.291842  | 2.153438  |
| C  | -2.624058 | 5.260907  | -0.638315 |
| H  | -1.065857 | 5.074526  | -2.097773 |
| H  | -4.020888 | 5.232483  | 1.018257  |
| H  | -3.088161 | 6.118736  | -1.112515 |
| C  | 1.702702  | -0.155232 | 2.510339  |
| C  | 0.366489  | 3.101497  | -0.999017 |
| H  | 2.618015  | -0.022862 | 3.084840  |
| H  | 0.992669  | 3.809337  | -1.538603 |
| Os | -0.120415 | 0.374437  | 0.117866  |
| O  | -1.594977 | 0.639431  | -0.876823 |
| Fe | 1.807181  | -2.257077 | -1.752455 |
| Cl | 0.311474  | -3.894454 | -1.944774 |
| Cl | 2.440338  | -1.171406 | -3.595625 |
| Cl | 3.486494  | -2.688947 | -0.342766 |
| C  | -4.851255 | 0.134732  | -1.058372 |
| C  | -6.227017 | -0.581791 | -0.955037 |
| C  | -6.140002 | -2.024127 | -1.468842 |
| C  | -5.053056 | -2.819858 | -0.736294 |
| C  | -3.672420 | -2.111578 | -0.838426 |
| C  | -3.809594 | -0.690688 | -0.325730 |
| H  | -7.111074 | -2.521215 | -1.344897 |

|   |           |           |           |
|---|-----------|-----------|-----------|
| H | -6.554512 | -0.580047 | 0.093255  |
| H | -6.966433 | -0.004735 | -1.523696 |
| H | -4.577914 | 0.229226  | -2.117195 |
| H | -4.920731 | 1.144596  | -0.639492 |
| H | -2.921214 | -2.667561 | -0.268008 |
| H | -3.355302 | -2.103682 | -1.889137 |
| H | -3.937544 | -0.648981 | 0.762293  |
| H | -2.774100 | -0.140236 | -0.510260 |
| H | -5.924420 | -2.016775 | -2.546435 |
| H | -5.323308 | -2.929249 | 0.322776  |
| H | -4.958534 | -3.831186 | -1.149855 |

#### **INT4a**

|   |           |           |           |
|---|-----------|-----------|-----------|
| N | 0.394012  | 1.055183  | -0.096248 |
| N | 1.957433  | -1.204635 | 0.351959  |
| N | -0.317807 | -1.068181 | 1.618033  |
| O | 0.677589  | -0.810466 | -2.256797 |
| O | -0.683391 | -2.427084 | -0.668757 |
| C | 2.043889  | -1.434164 | 1.832500  |
| C | 3.349354  | -0.979917 | 2.499013  |
| C | 0.835042  | -0.718020 | 2.481081  |
| H | 1.912384  | -2.514454 | 1.980263  |
| C | 3.276172  | -1.243853 | 4.016085  |
| H | 3.505685  | 0.087779  | 2.299162  |
| H | 4.206350  | -1.522645 | 2.087308  |
| C | 0.738412  | -1.058671 | 3.968162  |
| H | 0.974926  | 0.364641  | 2.377849  |
| C | 2.037219  | -0.610695 | 4.664858  |
| H | 4.186748  | -0.857939 | 4.486197  |
| H | 3.266376  | -2.328169 | 4.190665  |
| H | -0.123907 | -0.549916 | 4.412866  |
| H | 0.597242  | -2.138641 | 4.107370  |
| H | 1.988277  | -0.881689 | 5.724652  |
| H | 2.112270  | 0.483664  | 4.621461  |
| C | 1.921132  | -0.973206 | -2.698935 |
| C | 3.048742  | -1.234022 | -1.853623 |
| C | 2.114359  | -0.909953 | -4.091631 |
| C | 4.325362  | -1.415681 | -2.455190 |

|    |           |           |           |
|----|-----------|-----------|-----------|
| C  | 3.376818  | -1.079464 | -4.638287 |
| H  | 1.249097  | -0.720001 | -4.717580 |
| C  | 4.495480  | -1.333746 | -3.820997 |
| H  | 5.175743  | -1.619984 | -1.811288 |
| H  | 3.500098  | -1.018387 | -5.715475 |
| H  | 5.477166  | -1.468051 | -4.261641 |
| C  | -1.796696 | -2.895674 | -0.129682 |
| C  | -2.201010 | -2.537905 | 1.196208  |
| C  | -2.575092 | -3.820106 | -0.855334 |
| C  | -3.372915 | -3.109554 | 1.743125  |
| C  | -3.738418 | -4.334746 | -0.304032 |
| H  | -2.247100 | -4.099729 | -1.850868 |
| C  | -4.148629 | -3.978146 | 0.996337  |
| H  | -3.658465 | -2.851591 | 2.759014  |
| H  | -4.339454 | -5.029569 | -0.882940 |
| H  | -5.058254 | -4.396035 | 1.413976  |
| C  | 2.990914  | -1.370537 | -0.434939 |
| C  | -1.316136 | -1.792622 | 2.037834  |
| H  | 3.922483  | -1.656258 | 0.048412  |
| H  | -1.435756 | -1.906840 | 3.113794  |
| Os | 0.164046  | -0.611710 | -0.343997 |
| O  | -1.800211 | -0.147602 | -1.292321 |
| Fe | 0.689119  | 2.999884  | 0.427117  |
| Cl | -0.080628 | 4.291452  | -1.220762 |
| Cl | -0.430861 | 3.167794  | 2.355143  |
| Cl | 2.900656  | 3.099368  | 0.719644  |
| C  | -3.655852 | 1.102960  | -2.256718 |
| C  | -4.593722 | 2.312820  | -2.087691 |
| C  | -5.258380 | 2.313087  | -0.703204 |
| C  | -4.210666 | 2.246138  | 0.418000  |
| C  | -3.269400 | 1.038494  | 0.244153  |
| C  | -2.622029 | 1.073121  | -1.133258 |
| H  | -5.877508 | 3.210078  | -0.584808 |
| H  | -4.018630 | 3.239424  | -2.220310 |
| H  | -5.349798 | 2.295554  | -2.880587 |
| H  | -4.237705 | 0.172056  | -2.223603 |
| H  | -3.153475 | 1.145678  | -3.232297 |
| H  | -2.501571 | 1.044224  | 1.025795  |

|   |           |           |           |
|---|-----------|-----------|-----------|
| H | -3.838084 | 0.104409  | 0.340878  |
| H | -1.946012 | 1.931483  | -1.217779 |
| H | -1.591473 | -0.257626 | -2.241437 |
| H | -5.933649 | 1.449165  | -0.624146 |
| H | -3.617847 | 3.171062  | 0.421600  |
| H | -4.697707 | 2.183819  | 1.397608  |

**INT1b**

|   |           |           |           |
|---|-----------|-----------|-----------|
| N | 0.972289  | -0.589042 | -0.900030 |
| N | -0.375846 | -1.135060 | 1.608035  |
| N | 1.002429  | 1.122154  | 1.336075  |
| O | -1.907232 | -0.556955 | -0.770775 |
| O | -0.656442 | 1.816095  | -0.948015 |
| C | 0.296415  | -0.651569 | 2.855639  |
| C | 0.745521  | -1.738422 | 3.838831  |
| C | 1.486792  | 0.226011  | 2.427510  |
| H | -0.443058 | -0.004433 | 3.343634  |
| C | 1.417144  | -1.081566 | 5.060036  |
| H | 1.441820  | -2.424145 | 3.338521  |
| H | -0.111685 | -2.326723 | 4.181602  |
| C | 2.124723  | 0.912366  | 3.637952  |
| H | 2.235003  | -0.420111 | 1.948731  |
| C | 2.569633  | -0.153300 | 4.657258  |
| H | 1.781324  | -1.866802 | 5.730738  |
| H | 0.663096  | -0.512297 | 5.619963  |
| H | 2.997277  | 1.497279  | 3.329160  |
| H | 1.404118  | 1.603187  | 4.095255  |
| H | 2.978373  | 0.346934  | 5.541411  |
| H | 3.386460  | -0.745381 | 4.224087  |
| C | -2.349186 | -1.816728 | -0.589030 |
| C | -1.955802 | -2.646776 | 0.504731  |
| C | -3.271981 | -2.310245 | -1.522788 |
| C | -2.513746 | -3.948252 | 0.612352  |
| C | -3.782599 | -3.596727 | -1.396534 |
| H | -3.571857 | -1.669892 | -2.344966 |
| C | -3.403852 | -4.427402 | -0.328334 |
| H | -2.219684 | -4.569494 | 1.453235  |
| H | -4.487888 | -3.959337 | -2.138242 |

|    |           |           |           |
|----|-----------|-----------|-----------|
| H  | -3.811443 | -5.428280 | -0.239785 |
| C  | 0.085152  | 2.940248  | -0.909608 |
| C  | 1.066697  | 3.227022  | 0.088630  |
| C  | -0.182162 | 3.896801  | -1.899829 |
| C  | 1.735335  | 4.478494  | 0.048609  |
| C  | 0.505137  | 5.105027  | -1.917852 |
| H  | -0.933372 | 3.664637  | -2.647035 |
| C  | 1.470783  | 5.404281  | -0.942234 |
| H  | 2.473849  | 4.694871  | 0.814852  |
| H  | 0.285702  | 5.826132  | -2.699453 |
| H  | 1.998678  | 6.351215  | -0.963833 |
| C  | -1.101035 | -2.220173 | 1.569095  |
| C  | 1.412826  | 2.348246  | 1.164196  |
| H  | -1.068581 | -2.866698 | 2.443691  |
| H  | 2.103633  | 2.747125  | 1.903975  |
| Os | -0.204307 | 0.144533  | 0.032737  |
| Fe | 2.695521  | -1.383212 | -1.825418 |
| Cl | 2.165700  | -3.471933 | -2.340618 |
| Cl | 3.162910  | 0.026747  | -3.470725 |
| Cl | 4.071151  | -1.174637 | -0.073320 |
| O  | -1.873414 | 2.555082  | 1.611328  |
| H  | -1.859440 | 2.850702  | 0.678837  |
| O  | -1.897753 | 1.118651  | 1.459960  |
| H  | -2.843084 | 0.954806  | 1.133074  |
| C  | -6.150273 | 1.749393  | -0.861169 |
| H  | -6.083046 | 2.627879  | -1.510217 |
| H  | -6.683045 | 1.997968  | 0.056351  |
| H  | -6.698899 | 0.977592  | -1.411594 |
| C  | -4.773155 | 1.247570  | -0.535906 |
| O  | -4.024927 | 1.031602  | -1.614917 |
| H  | -3.166516 | 0.611386  | -1.355089 |
| O  | -4.378508 | 1.048741  | 0.613335  |

**TS1b**

|   |           |           |           |
|---|-----------|-----------|-----------|
| N | 0.623549  | -0.576741 | -1.019870 |
| N | -0.323074 | -0.913252 | 1.600532  |
| N | 1.463632  | 1.029546  | 1.070491  |
| O | -2.102174 | -0.194567 | -0.668345 |

|   |           |           |           |
|---|-----------|-----------|-----------|
| O | -0.301580 | 2.178111  | -0.941324 |
| C | 0.607111  | -0.575170 | 2.720006  |
| C | 0.938593  | -1.721938 | 3.679916  |
| C | 1.887295  | 0.015693  | 2.087622  |
| H | 0.101783  | 0.228641  | 3.270056  |
| C | 1.922979  | -1.234725 | 4.758476  |
| H | 1.373093  | -2.559181 | 3.118070  |
| H | 0.027340  | -2.084891 | 4.166903  |
| C | 2.853481  | 0.519522  | 3.163910  |
| H | 2.380984  | -0.776015 | 1.507791  |
| C | 3.185644  | -0.620998 | 4.143590  |
| H | 2.187931  | -2.077839 | 5.404964  |
| H | 1.422658  | -0.492918 | 5.394986  |
| H | 3.782423  | 0.872704  | 2.704718  |
| H | 2.402127  | 1.365008  | 3.699477  |
| H | 3.841550  | -0.234205 | 4.930461  |
| H | 3.752548  | -1.397324 | 3.612742  |
| C | -2.620741 | -1.454259 | -0.424511 |
| C | -2.146731 | -2.267852 | 0.636157  |
| C | -3.644163 | -1.894514 | -1.258077 |
| C | -2.751770 | -3.536447 | 0.809343  |
| C | -4.211431 | -3.153698 | -1.061151 |
| H | -3.987199 | -1.248249 | -2.058622 |
| C | -3.762211 | -3.982480 | -0.028068 |
| H | -2.405578 | -4.168443 | 1.621384  |
| H | -5.004384 | -3.486847 | -1.723155 |
| H | -4.201609 | -4.962357 | 0.122307  |
| C | 0.715844  | 3.051826  | -1.069649 |
| C | 1.887608  | 3.047257  | -0.254238 |
| C | 0.563948  | 4.051081  | -2.041693 |
| C | 2.860291  | 4.062127  | -0.450866 |
| C | 1.546111  | 5.018345  | -2.220445 |
| H | -0.335297 | 4.043320  | -2.648351 |
| C | 2.702845  | 5.030931  | -1.423625 |
| H | 3.746191  | 4.059798  | 0.177455  |
| H | 1.409273  | 5.775849  | -2.986351 |
| H | 3.460904  | 5.792975  | -1.566964 |
| C | -1.137186 | -1.920351 | 1.614599  |

|    |           |           |           |
|----|-----------|-----------|-----------|
| C  | 2.154614  | 2.096567  | 0.783457  |
| H  | -1.064006 | -2.604545 | 2.457209  |
| H  | 3.040333  | 2.284206  | 1.385178  |
| Os | -0.183149 | 0.449063  | 0.072531  |
| Fe | 1.885600  | -1.992542 | -1.807708 |
| Cl | 1.417058  | -3.707818 | -0.457792 |
| Cl | 1.610127  | -2.347963 | -3.975608 |
| Cl | 3.842116  | -1.069201 | -1.261304 |
| O  | -1.507473 | 2.858781  | 1.385218  |
| H  | -1.280156 | 3.055710  | 0.449067  |
| O  | -1.381331 | 1.422090  | 1.422576  |
| H  | -3.332931 | 1.967927  | 1.246786  |
| C  | -6.157795 | 2.324444  | -0.280870 |
| H  | -6.530098 | 1.916631  | -1.220229 |
| H  | -6.198961 | 3.418993  | -0.315788 |
| H  | -6.782709 | 1.999365  | 0.555525  |
| C  | -4.738077 | 1.896543  | -0.059857 |
| O  | -4.050358 | 1.379467  | -0.949534 |
| H  | -2.850895 | 0.520621  | -0.790656 |
| O  | -4.297834 | 2.144208  | 1.161510  |

### INT2c

|   |           |           |           |
|---|-----------|-----------|-----------|
| N | 0.714838  | -0.508182 | -0.984574 |
| N | -0.218701 | -1.235005 | 1.646176  |
| N | 1.470822  | 0.807235  | 1.340798  |
| O | -2.021035 | -0.228130 | -0.466398 |
| O | -0.444362 | 2.107254  | -0.479734 |
| C | 0.739533  | -1.025512 | 2.777348  |
| C | 1.150189  | -2.288517 | 3.541903  |
| C | 1.973614  | -0.302089 | 2.200881  |
| H | 0.232828  | -0.334474 | 3.462861  |
| C | 2.150699  | -1.920630 | 4.653496  |
| H | 1.598171  | -3.010539 | 2.846546  |
| H | 0.274846  | -2.763681 | 3.996065  |
| C | 2.952341  | 0.089995  | 3.310929  |
| H | 2.475350  | -0.992228 | 1.507470  |
| C | 3.365778  | -1.162273 | 4.106145  |
| H | 2.472709  | -2.836561 | 5.159928  |

|    |           |           |           |
|----|-----------|-----------|-----------|
| H  | 1.640891  | -1.305577 | 5.407147  |
| H  | 3.847265  | 0.553291  | 2.882675  |
| H  | 2.480854  | 0.824480  | 3.977184  |
| H  | 4.025185  | -0.861696 | 4.927130  |
| H  | 3.952889  | -1.824427 | 3.456135  |
| C  | -2.548540 | -1.455624 | -0.332372 |
| C  | -2.127755 | -2.410648 | 0.649339  |
| C  | -3.598696 | -1.804339 | -1.199755 |
| C  | -2.806489 | -3.657644 | 0.728818  |
| C  | -4.222575 | -3.041486 | -1.105642 |
| H  | -3.909594 | -1.086786 | -1.950420 |
| C  | -3.832662 | -3.980016 | -0.135351 |
| H  | -2.491337 | -4.368012 | 1.487583  |
| H  | -5.025568 | -3.280577 | -1.796564 |
| H  | -4.329536 | -4.941365 | -0.066710 |
| C  | 0.543060  | 3.044534  | -0.513299 |
| C  | 1.709039  | 3.013825  | 0.304768  |
| C  | 0.337804  | 4.123962  | -1.378749 |
| C  | 2.618092  | 4.099300  | 0.226582  |
| C  | 1.260047  | 5.164606  | -1.443431 |
| H  | -0.555200 | 4.126712  | -1.994679 |
| C  | 2.406815  | 5.159500  | -0.636699 |
| H  | 3.503515  | 4.078808  | 0.855241  |
| H  | 1.081125  | 5.988933  | -2.127084 |
| H  | 3.120290  | 5.974562  | -0.688391 |
| C  | -1.087427 | -2.208002 | 1.609902  |
| C  | 2.065226  | 1.953735  | 1.210431  |
| H  | -1.008974 | -2.964190 | 2.388032  |
| H  | 2.945084  | 2.133379  | 1.824812  |
| Os | -0.160566 | 0.235252  | 0.251563  |
| Fe | 1.987084  | -1.408322 | -2.358956 |
| Cl | 0.689620  | -2.237975 | -3.947068 |
| Cl | 3.381829  | 0.201369  | -3.003419 |
| Cl | 2.908906  | -2.905735 | -0.977707 |
| O  | -1.945506 | 2.360686  | 1.550638  |
| H  | -1.497030 | 2.584361  | 0.671660  |
| O  | -1.323195 | 1.077967  | 1.875072  |
| H  | -3.005301 | 2.134577  | 1.324868  |



|   |           |          |           |
|---|-----------|----------|-----------|
| C | -6.193820 | 2.269502 | -0.429181 |
| H | -6.780277 | 1.353608 | -0.563580 |
| H | -6.218422 | 2.815632 | -1.376395 |
| H | -6.627401 | 2.868009 | 0.371179  |
| C | -4.783786 | 1.898620 | -0.091912 |
| O | -4.109453 | 1.373967 | -1.091289 |
| H | -3.245673 | 0.950235 | -0.817956 |
| O | -4.315889 | 2.074179 | 1.047576  |

**TS2b**

|   |           |           |           |
|---|-----------|-----------|-----------|
| N | 0.240164  | -0.587094 | -1.040989 |
| N | 0.193965  | -1.203981 | 1.701601  |
| N | 2.203759  | 0.316660  | 0.757669  |
| O | -1.942843 | 0.328696  | 0.252284  |
| O | 0.338646  | 2.226996  | -0.464064 |
| C | 1.488936  | -1.333131 | 2.435367  |
| C | 1.758787  | -2.693090 | 3.086547  |
| C | 2.616018  | -0.945073 | 1.451404  |
| H | 1.444735  | -0.561445 | 3.214855  |
| C | 3.125819  | -2.669197 | 3.794465  |
| H | 1.739424  | -3.480217 | 2.321301  |
| H | 0.981329  | -2.924113 | 3.822048  |
| C | 3.969678  | -0.898871 | 2.169065  |
| H | 2.653291  | -1.707938 | 0.661309  |
| C | 4.253820  | -2.253186 | 2.844028  |
| H | 3.327844  | -3.661235 | 4.211508  |
| H | 3.080626  | -1.972816 | 4.642213  |
| H | 4.772402  | -0.684967 | 1.456502  |
| H | 3.962029  | -0.092898 | 2.914773  |
| H | 5.202463  | -2.188093 | 3.387032  |
| H | 4.384916  | -3.020628 | 2.069870  |
| C | -2.646153 | -0.707292 | 0.561449  |
| C | -2.143448 | -1.854337 | 1.319266  |
| C | -4.021164 | -0.715235 | 0.144365  |
| C | -3.031189 | -2.905978 | 1.592252  |
| C | -4.841264 | -1.784243 | 0.415736  |
| H | -4.379289 | 0.146588  | -0.406446 |
| C | -4.349863 | -2.893920 | 1.140611  |

|    |           |           |           |
|----|-----------|-----------|-----------|
| H  | -2.676711 | -3.753251 | 2.171006  |
| H  | -5.870757 | -1.776765 | 0.073591  |
| H  | -5.000152 | -3.734600 | 1.355884  |
| C  | 1.482748  | 2.778403  | -0.898397 |
| C  | 2.788624  | 2.315296  | -0.542123 |
| C  | 1.365718  | 3.914093  | -1.716195 |
| C  | 3.921566  | 3.025386  | -1.025904 |
| C  | 2.495322  | 4.574101  | -2.181178 |
| H  | 0.369201  | 4.253497  | -1.978437 |
| C  | 3.785666  | 4.133081  | -1.837759 |
| H  | 4.910572  | 2.669809  | -0.751435 |
| H  | 2.374580  | 5.444049  | -2.819847 |
| H  | 4.661454  | 4.656321  | -2.205306 |
| C  | -0.829575 | -1.973370 | 1.904318  |
| C  | 3.061341  | 1.176787  | 0.278258  |
| H  | -0.705503 | -2.806059 | 2.592499  |
| H  | 4.109840  | 1.000967  | 0.506465  |
| Os | 0.227358  | 0.369778  | 0.395303  |
| Fe | -0.036123 | -1.878301 | -2.537219 |
| Cl | -1.987000 | -1.282846 | -3.456922 |
| Cl | 1.738452  | -1.615305 | -3.881193 |
| Cl | -0.086505 | -3.900648 | -1.556506 |
| O  | -0.384463 | 3.076438  | 1.946260  |
| H  | -0.138104 | 3.112967  | 0.982594  |
| O  | -0.253593 | 1.295230  | 2.035628  |
| H  | -1.399111 | 3.125206  | 1.961017  |
| C  | -5.012453 | 4.245167  | 0.860467  |
| H  | -5.898392 | 3.602322  | 0.891825  |
| H  | -5.035981 | 4.787166  | -0.090047 |
| H  | -5.032851 | 4.945987  | 1.694531  |
| C  | -3.774364 | 3.398927  | 0.932287  |
| O  | -3.643659 | 2.581301  | -0.112123 |
| H  | -2.888404 | 1.959855  | 0.012484  |
| O  | -2.969857 | 3.452287  | 1.859951  |

### **INT3b**

|   |           |           |           |
|---|-----------|-----------|-----------|
| N | -0.301126 | -0.703467 | 0.626768  |
| N | -0.778068 | 1.567478  | -0.856702 |

|   |           |           |           |
|---|-----------|-----------|-----------|
| N | 1.740809  | 1.088314  | 0.022015  |
| O | -1.133051 | -1.213674 | -1.942487 |
| O | 1.734890  | -1.749827 | -0.944523 |
| C | 0.026150  | 2.771012  | -0.497472 |
| C | -0.770503 | 3.977621  | 0.007189  |
| C | 1.096763  | 2.330820  | 0.539608  |
| H | 0.550851  | 3.037412  | -1.424832 |
| C | 0.182995  | 5.132395  | 0.362813  |
| H | -1.355731 | 3.686380  | 0.889051  |
| H | -1.471603 | 4.314515  | -0.763750 |
| C | 2.047153  | 3.481416  | 0.880920  |
| H | 0.567466  | 2.010614  | 1.446973  |
| C | 1.246262  | 4.698449  | 1.377739  |
| H | -0.403754 | 5.966216  | 0.761784  |
| H | 0.669123  | 5.496689  | -0.552121 |
| H | 2.748856  | 3.168877  | 1.661608  |
| H | 2.632812  | 3.753083  | -0.007550 |
| H | 1.939224  | 5.522159  | 1.577706  |
| H | 0.765830  | 4.449192  | 2.332784  |
| C | -2.352188 | -0.844765 | -1.978615 |
| C | -2.858855 | 0.456482  | -1.526301 |
| C | -3.290945 | -1.801671 | -2.521783 |
| C | -4.226928 | 0.684360  | -1.618229 |
| C | -4.640029 | -1.532817 | -2.570220 |
| H | -2.876785 | -2.744800 | -2.860486 |
| C | -5.118658 | -0.290956 | -2.111680 |
| H | -4.627170 | 1.643972  | -1.306053 |
| H | -5.331546 | -2.271383 | -2.960470 |
| H | -6.179432 | -0.068417 | -2.147035 |
| C | 2.988528  | -1.629522 | -0.741673 |
| C | 3.659286  | -0.406943 | -0.287012 |
| C | 3.786821  | -2.809937 | -0.977993 |
| C | 5.041875  | -0.444688 | -0.136001 |
| C | 5.155261  | -2.787532 | -0.832363 |
| H | 3.253569  | -3.699987 | -1.292973 |
| C | 5.793213  | -1.602775 | -0.416271 |
| H | 5.560991  | 0.441360  | 0.215877  |
| H | 5.740793  | -3.678483 | -1.031086 |

|    |           |           |           |
|----|-----------|-----------|-----------|
| H  | 6.870400  | -1.577924 | -0.293423 |
| C  | -2.048869 | 1.576787  | -1.070414 |
| C  | 3.000696  | 0.826603  | 0.110457  |
| H  | -2.589378 | 2.508178  | -0.918498 |
| H  | 3.652949  | 1.581720  | 0.543296  |
| Os | 0.383888  | -0.108338 | -0.908204 |
| Fe | -1.202670 | -1.099231 | 2.265072  |
| Cl | -2.669548 | -2.768890 | 1.904586  |
| Cl | 0.328499  | -1.621206 | 3.839331  |
| Cl | -2.239548 | 0.852856  | 2.787103  |
| O  | 1.011556  | 0.342885  | -2.521402 |

**TS3b**

|   |           |           |           |
|---|-----------|-----------|-----------|
| N | -1.325243 | -0.398897 | -0.858044 |
| N | -0.845479 | 0.546757  | 1.692420  |
| N | 0.349599  | -1.755774 | 0.919179  |
| O | -0.114032 | 1.983671  | -0.908198 |
| O | 1.512285  | -0.467423 | -1.429502 |
| C | -0.680543 | -0.484097 | 2.758934  |
| C | -1.742234 | -0.474569 | 3.864226  |
| C | -0.597891 | -1.867657 | 2.072844  |
| H | 0.303510  | -0.269112 | 3.195953  |
| C | -1.441576 | -1.582633 | 4.889592  |
| H | -2.734389 | -0.624989 | 3.419363  |
| H | -1.750737 | 0.492241  | 4.377869  |
| C | -0.272102 | -2.960626 | 3.096522  |
| H | -1.575030 | -2.079797 | 1.617068  |
| C | -1.321001 | -2.957557 | 4.223391  |
| H | -2.235221 | -1.594554 | 5.643916  |
| H | -0.507802 | -1.343299 | 5.416043  |
| H | -0.272802 | -3.943749 | 2.615206  |
| H | 0.731635  | -2.791432 | 3.509218  |
| H | -1.048815 | -3.715786 | 4.965073  |
| H | -2.294082 | -3.254191 | 3.810440  |
| C | -0.819467 | 2.893115  | -0.368934 |
| C | -1.476953 | 2.804991  | 0.943131  |
| C | -0.967451 | 4.115707  | -1.132115 |
| C | -2.203126 | 3.908907  | 1.374533  |

|    |           |           |           |
|----|-----------|-----------|-----------|
| C  | -1.710416 | 5.173864  | -0.661449 |
| H  | -0.468467 | 4.143383  | -2.094451 |
| C  | -2.335604 | 5.077303  | 0.595768  |
| H  | -2.690901 | 3.875124  | 2.343529  |
| H  | -1.814483 | 6.076441  | -1.253587 |
| H  | -2.924215 | 5.903999  | 0.978173  |
| C  | 2.115252  | -1.642034 | -1.549620 |
| C  | 1.939484  | -2.750070 | -0.655335 |
| C  | 3.003932  | -1.784532 | -2.636227 |
| C  | 2.655583  | -3.949440 | -0.903085 |
| C  | 3.675950  | -2.977560 | -2.852947 |
| H  | 3.131275  | -0.936361 | -3.300096 |
| C  | 3.507292  | -4.072097 | -1.984839 |
| H  | 2.520158  | -4.783544 | -0.220305 |
| H  | 4.344469  | -3.062881 | -3.704400 |
| H  | 4.041560  | -4.999415 | -2.159896 |
| C  | -1.414512 | 1.688033  | 1.875205  |
| C  | 1.099378  | -2.737225 | 0.503043  |
| H  | -1.901846 | 1.867594  | 2.831771  |
| H  | 1.090893  | -3.650289 | 1.093160  |
| Os | 0.150380  | -0.001023 | -0.046141 |
| Fe | -3.212338 | -0.555508 | -1.484761 |
| Cl | -3.164170 | -1.093556 | -3.646712 |
| Cl | -4.029514 | -2.176965 | -0.157933 |
| Cl | -4.186656 | 1.423091  | -1.048119 |
| O  | 1.509002  | 0.925649  | 0.932934  |
| C  | 4.299574  | 1.908635  | -0.862345 |
| C  | 5.814184  | 2.094598  | -1.126838 |
| C  | 6.564484  | 2.453836  | 0.163172  |
| C  | 6.321358  | 1.415029  | 1.266853  |
| C  | 4.807678  | 1.225377  | 1.536083  |
| C  | 4.091323  | 0.877374  | 0.238403  |
| H  | 7.639913  | 2.537953  | -0.040353 |
| H  | 6.223602  | 1.163582  | -1.543212 |
| H  | 5.954985  | 2.872137  | -1.888012 |
| H  | 3.871062  | 2.871296  | -0.551012 |
| H  | 3.786606  | 1.604752  | -1.781401 |
| H  | 4.654335  | 0.444317  | 2.290204  |

|   |          |           |           |
|---|----------|-----------|-----------|
| H | 4.397919 | 2.159281  | 1.944398  |
| H | 4.345746 | -0.134468 | -0.103520 |
| H | 2.944834 | 0.833015  | 0.472853  |
| H | 6.232337 | 3.441601  | 0.513861  |
| H | 6.756653 | 0.451510  | 0.967114  |
| H | 6.819244 | 1.713086  | 2.197978  |

#### **INT4b**

|   |           |           |           |
|---|-----------|-----------|-----------|
| N | 1.717172  | 0.001689  | -0.478065 |
| N | -0.419629 | -0.984992 | 1.153623  |
| N | -0.019710 | 1.635883  | 0.989419  |
| O | -0.515545 | -1.222749 | -1.735236 |
| O | -0.366879 | 1.454272  | -1.906808 |
| C | -0.636845 | -0.228860 | 2.428953  |
| C | -0.338572 | -0.993360 | 3.723398  |
| C | 0.194599  | 1.067874  | 2.348943  |
| H | -1.696786 | 0.058979  | 2.424515  |
| C | -0.606795 | -0.081145 | 4.935687  |
| H | 0.705657  | -1.331386 | 3.717820  |
| H | -0.975023 | -1.880680 | 3.801630  |
| C | -0.108532 | 1.987989  | 3.534005  |
| H | 1.258098  | 0.790827  | 2.378506  |
| C | 0.169059  | 1.238947  | 4.850889  |
| H | -0.339124 | -0.618721 | 5.851304  |
| H | -1.683403 | 0.128259  | 4.995818  |
| H | 0.520524  | 2.883253  | 3.490538  |
| H | -1.156489 | 2.314461  | 3.494234  |
| H | -0.094786 | 1.886880  | 5.693266  |
| H | 1.245944  | 1.040393  | 4.930968  |
| C | -0.562516 | -2.521780 | -1.452939 |
| C | -0.543766 | -3.069755 | -0.126958 |
| C | -0.663479 | -3.403459 | -2.546746 |
| C | -0.614638 | -4.481805 | 0.034891  |
| C | -0.714950 | -4.774561 | -2.348648 |
| H | -0.685637 | -2.975595 | -3.543167 |
| C | -0.687674 | -5.326177 | -1.052385 |
| H | -0.606951 | -4.887892 | 1.042266  |
| H | -0.780259 | -5.431381 | -3.211047 |

|    |           |           |           |
|----|-----------|-----------|-----------|
| H  | -0.730759 | -6.400680 | -0.912716 |
| C  | -0.363573 | 2.791115  | -1.791119 |
| C  | -0.271292 | 3.510646  | -0.558372 |
| C  | -0.496575 | 3.513433  | -2.988995 |
| C  | -0.324316 | 4.930094  | -0.588969 |
| C  | -0.532138 | 4.901665  | -2.981163 |
| H  | -0.566891 | 2.953548  | -3.915391 |
| C  | -0.447000 | 5.622399  | -1.777226 |
| H  | -0.259191 | 5.469193  | 0.351977  |
| H  | -0.631075 | 5.433462  | -3.922831 |
| H  | -0.478152 | 6.706348  | -1.781510 |
| C  | -0.548033 | -2.286581 | 1.064018  |
| C  | -0.138827 | 2.907412  | 0.732733  |
| H  | -0.693098 | -2.832797 | 1.993661  |
| H  | -0.130265 | 3.590526  | 1.579559  |
| Os | 0.055692  | 0.182418  | -0.433667 |
| Fe | 3.725286  | -0.497972 | -0.138072 |
| Cl | 4.548688  | -1.139597 | -2.095299 |
| Cl | 4.485166  | 1.435117  | 0.666684  |
| Cl | 3.477934  | -2.082593 | 1.414939  |
| O  | -2.346700 | 0.565577  | -0.384076 |
| C  | -4.564924 | 0.813170  | 0.620376  |
| C  | -5.846784 | 0.075148  | 1.047018  |
| C  | -6.454299 | -0.714750 | -0.122299 |
| C  | -5.428007 | -1.674593 | -0.743145 |
| C  | -4.143017 | -0.937890 | -1.164894 |
| C  | -3.554705 | -0.161039 | 0.012723  |
| H  | -7.334067 | -1.274037 | 0.217443  |
| H  | -5.612451 | -0.612969 | 1.872190  |
| H  | -6.570595 | 0.797974  | 1.440562  |
| H  | -4.811827 | 1.576042  | -0.131505 |
| H  | -4.111541 | 1.333545  | 1.472434  |
| H  | -3.403152 | -1.642231 | -1.559253 |
| H  | -4.379550 | -0.228714 | -1.972753 |
| H  | -3.209567 | -0.862131 | 0.778959  |
| H  | -2.494137 | 0.964435  | -1.260850 |
| H  | -6.805051 | -0.011503 | -0.891045 |
| H  | -5.171566 | -2.457963 | -0.015676 |

|   |           |           |           |
|---|-----------|-----------|-----------|
| H | -5.855513 | -2.185413 | -1.613347 |
|---|-----------|-----------|-----------|

**INT1c**

|   |           |           |           |
|---|-----------|-----------|-----------|
| N | 0.077021  | -0.553479 | -2.387617 |
| N | -0.436042 | -1.960900 | 0.088607  |
| N | 1.914690  | -0.756376 | -0.239175 |
| O | -1.829701 | 0.517366  | -0.483667 |
| O | 0.509674  | 1.773594  | -0.707405 |
| C | 0.732158  | -2.663924 | 0.704709  |
| C | 0.632893  | -4.192764 | 0.768736  |
| C | 1.997159  | -2.232634 | -0.064547 |
| H | 0.808738  | -2.258795 | 1.722500  |
| C | 1.903294  | -4.771257 | 1.419416  |
| H | 0.505086  | -4.591586 | -0.246267 |
| H | -0.237924 | -4.500640 | 1.355811  |
| C | 3.259733  | -2.773405 | 0.611064  |
| H | 1.933864  | -2.644893 | -1.081300 |
| C | 3.178989  | -4.308408 | 0.704767  |
| H | 1.842073  | -5.864709 | 1.413713  |
| H | 1.939627  | -4.462593 | 2.472895  |
| H | 4.149517  | -2.492716 | 0.037235  |
| H | 3.358520  | -2.338602 | 1.614335  |
| H | 4.064078  | -4.682386 | 1.230184  |
| H | 3.209892  | -4.732839 | -0.307612 |
| C | -2.912557 | -0.275000 | -0.415765 |
| C | -2.860916 | -1.666520 | -0.099354 |
| C | -4.163111 | 0.325213  | -0.636837 |
| C | -4.076306 | -2.395354 | -0.015836 |
| C | -5.330687 | -0.423577 | -0.566399 |
| H | -4.193430 | 1.385382  | -0.864295 |
| C | -5.295740 | -1.794248 | -0.258479 |
| H | -4.029295 | -3.449810 | 0.240881  |
| H | -6.283315 | 0.064727  | -0.749749 |
| H | -6.213533 | -2.369296 | -0.202345 |
| C | 1.745353  | 2.259641  | -0.582312 |
| C | 2.909079  | 1.480378  | -0.278129 |
| C | 1.888378  | 3.653125  | -0.727172 |
| C | 4.159090  | 2.142926  | -0.130025 |



|    |           |           |           |
|----|-----------|-----------|-----------|
| C  | 3.126391  | 4.261956  | -0.585273 |
| H  | 0.998030  | 4.230384  | -0.952861 |
| C  | 4.276397  | 3.508695  | -0.284775 |
| H  | 5.034777  | 1.543395  | 0.102483  |
| H  | 3.203754  | 5.338503  | -0.707015 |
| H  | 5.239622  | 3.994696  | -0.174874 |
| C  | -1.661449 | -2.373007 | 0.244164  |
| C  | 2.919114  | 0.058768  | -0.091837 |
| H  | -1.803271 | -3.351666 | 0.699315  |
| H  | 3.873382  | -0.373722 | 0.202428  |
| Os | 0.042588  | -0.171633 | -0.783072 |
| O  | 1.011910  | 0.609539  | 2.542030  |
| H  | 1.460308  | 1.339716  | 2.072025  |
| O  | -0.129010 | 0.343821  | 1.691399  |
| H  | -0.724110 | 1.136334  | 1.857748  |
| C  | -2.524559 | 4.732237  | 1.912058  |
| H  | -2.266185 | 4.882375  | 2.960123  |
| H  | -3.610867 | 4.791276  | 1.785931  |
| H  | -2.081396 | 5.521692  | 1.297052  |
| C  | -2.037090 | 3.387001  | 1.448998  |
| O  | -2.255126 | 3.174863  | 0.154641  |
| H  | -1.964065 | 2.261689  | -0.101601 |
| O  | -1.499491 | 2.571374  | 2.195622  |

### TS1c

|   |           |           |           |
|---|-----------|-----------|-----------|
| N | -0.222531 | 0.233573  | -2.183177 |
| N | 0.522439  | 1.785538  | 0.072166  |
| N | -1.992401 | 0.829090  | -0.088948 |
| O | 1.815257  | -0.785453 | -0.675481 |
| O | -1.007345 | -1.904406 | -0.434698 |
| C | -0.513868 | 2.575161  | 0.799617  |
| C | -0.239139 | 4.074972  | 0.938200  |
| C | -1.867593 | 2.307425  | 0.101744  |
| H | -0.558071 | 2.117622  | 1.795724  |
| C | -1.397055 | 4.755515  | 1.689725  |
| H | -0.120209 | 4.524069  | -0.056869 |
| H | 0.692196  | 4.239898  | 1.490359  |
| C | -3.017181 | 2.976750  | 0.863280  |

|    |           |           |           |
|----|-----------|-----------|-----------|
| H  | -1.814675 | 2.726973  | -0.912771 |
| C  | -2.746738 | 4.484159  | 1.016349  |
| H  | -1.206861 | 5.832857  | 1.739828  |
| H  | -1.420713 | 4.389628  | 2.724932  |
| H  | -3.961400 | 2.838047  | 0.326888  |
| H  | -3.123615 | 2.508816  | 1.850953  |
| H  | -3.558600 | 4.934902  | 1.596890  |
| H  | -2.766523 | 4.957382  | 0.025413  |
| C  | 2.890888  | 0.041909  | -0.933312 |
| C  | 2.840494  | 1.439036  | -0.693659 |
| C  | 4.049611  | -0.551688 | -1.427947 |
| C  | 4.000733  | 2.196515  | -0.982438 |
| C  | 5.172177  | 0.227024  | -1.706532 |
| H  | 4.059505  | -1.623707 | -1.592131 |
| C  | 5.148648  | 1.608744  | -1.491606 |
| H  | 3.980324  | 3.266138  | -0.795459 |
| H  | 6.065616  | -0.250251 | -2.096857 |
| H  | 6.020468  | 2.215379  | -1.711155 |
| C  | -2.318549 | -2.165418 | -0.524570 |
| C  | -3.351776 | -1.195053 | -0.343111 |
| C  | -2.682248 | -3.502855 | -0.760385 |
| C  | -4.706950 | -1.617411 | -0.397845 |
| C  | -4.017423 | -3.877212 | -0.824204 |
| H  | -1.887591 | -4.229962 | -0.890807 |
| C  | -5.043851 | -2.933715 | -0.642972 |
| H  | -5.485903 | -0.874790 | -0.249239 |
| H  | -4.267437 | -4.916970 | -1.014463 |
| H  | -6.084338 | -3.236041 | -0.690376 |
| C  | 1.740378  | 2.180148  | -0.103727 |
| C  | -3.129185 | 0.194759  | -0.072271 |
| H  | 1.991145  | 3.189446  | 0.217115  |
| H  | -4.017618 | 0.778587  | 0.157533  |
| Os | -0.222518 | -0.035141 | -0.532130 |
| O  | -0.415387 | -1.524260 | 2.176514  |
| H  | -0.663219 | -2.084452 | 1.408798  |
| O  | 0.207026  | -0.385616 | 1.503391  |
| H  | 1.470831  | -1.585364 | 2.405020  |
| C  | 3.979890  | -3.626352 | 2.514526  |

|   |          |           |           |
|---|----------|-----------|-----------|
| H | 4.565320 | -3.062366 | 3.245992  |
| H | 4.625451 | -4.024856 | 1.732168  |
| H | 3.498829 | -4.454305 | 3.047478  |
| C | 2.919672 | -2.749430 | 1.914066  |
| O | 2.695043 | -2.719480 | 0.696783  |
| H | 2.081574 | -1.597780 | -0.088586 |
| O | 2.252750 | -2.043724 | 2.805695  |

### INT2c

|   |           |           |           |
|---|-----------|-----------|-----------|
| N | 0.341141  | -0.226321 | -2.195159 |
| N | 0.139685  | -1.980223 | 0.092716  |
| N | 2.178480  | -0.256700 | -0.089813 |
| O | -1.860417 | 0.118135  | -0.525119 |
| O | 0.267382  | 1.981247  | -0.296044 |
| C | 1.416977  | -2.427618 | 0.729593  |
| C | 1.660265  | -3.940682 | 0.742849  |
| C | 2.571169  | -1.689349 | 0.019538  |
| H | 1.369555  | -2.058415 | 1.762201  |
| C | 3.012805  | -4.247891 | 1.411369  |
| H | 1.645643  | -4.323298 | -0.286473 |
| H | 0.866745  | -4.452855 | 1.296264  |
| C | 3.911910  | -1.974171 | 0.702459  |
| H | 2.613806  | -2.052673 | -1.017405 |
| C | 4.167736  | -3.491723 | 0.744046  |
| H | 3.194286  | -5.327280 | 1.372856  |
| H | 2.958916  | -3.974524 | 2.473767  |
| H | 4.727764  | -1.487616 | 0.157430  |
| H | 3.901239  | -1.562681 | 1.720489  |
| H | 5.104542  | -3.682511 | 1.278287  |
| H | 4.307538  | -3.862309 | -0.280410 |
| C | -2.660067 | -0.950116 | -0.625665 |
| C | -2.254245 | -2.294981 | -0.342639 |
| C | -3.996713 | -0.725410 | -1.010238 |
| C | -3.217003 | -3.336893 | -0.435192 |
| C | -4.902456 | -1.771771 | -1.108251 |
| H | -4.304270 | 0.290646  | -1.230860 |
| C | -4.519388 | -3.092636 | -0.819360 |
| H | -2.901348 | -4.349988 | -0.201996 |

|    |           |           |           |
|----|-----------|-----------|-----------|
| H  | -5.923254 | -1.559536 | -1.413086 |
| H  | -5.234422 | -3.904624 | -0.894144 |
| C  | 1.424005  | 2.687173  | -0.390386 |
| C  | 2.723508  | 2.128670  | -0.216234 |
| C  | 1.295477  | 4.063775  | -0.613838 |
| C  | 3.843806  | 2.996519  | -0.254146 |
| C  | 2.417623  | 4.884690  | -0.662127 |
| H  | 0.297738  | 4.469447  | -0.745019 |
| C  | 3.702817  | 4.354352  | -0.479619 |
| H  | 4.832845  | 2.570350  | -0.112266 |
| H  | 2.289795  | 5.948229  | -0.840627 |
| H  | 4.575088  | 4.998003  | -0.514174 |
| C  | -0.947534 | -2.696162 | 0.089952  |
| C  | 3.012281  | 0.731699  | -0.004776 |
| H  | -0.865939 | -3.720810 | 0.447831  |
| H  | 4.050868  | 0.496264  | 0.220370  |
| Os | 0.192006  | -0.048762 | -0.549030 |
| O  | -0.436902 | 1.476541  | 2.083087  |
| H  | -0.191191 | 1.983131  | 1.235585  |
| O  | -0.125232 | 0.097363  | 1.675364  |
| H  | -1.483629 | 1.527429  | 2.149330  |
| C  | -4.770952 | 3.303891  | 1.663008  |
| H  | -5.678759 | 2.765646  | 1.368071  |
| H  | -4.726140 | 4.220386  | 1.067753  |
| H  | -4.815603 | 3.539975  | 2.725847  |
| C  | -3.575640 | 2.444644  | 1.374004  |
| O  | -3.324513 | 2.299971  | 0.084795  |
| H  | -2.655299 | 1.577192  | -0.097115 |
| O  | -2.903115 | 1.919868  | 2.270855  |

The electronic energies (E, in hartrees) and electronic energies with  $\Delta H$  or  $\Delta G$  correction at 298 K for all the intermediates and TSs are given below. The energy is obtained at B3LYP level with the basis sets of LanL2DZ for Os and Fe and 6-31G(d) for non-metals. Solvent is  $\text{CH}_3\text{CO}_2\text{H}$ .

|                                   | E           | E + $\Delta H$ | E + $\Delta G$ |
|-----------------------------------|-------------|----------------|----------------|
| [OsNL] <sup>+</sup>               | -1179.83370 | -1179.43953    | -1179.51107    |
| H <sub>2</sub> O <sub>2</sub>     | -151.53568  | -151.50529     | -151.53176     |
| C <sub>6</sub> H <sub>12</sub>    | -235.87655  | -235.69895     | -235.73438     |
| CH <sub>3</sub> COOH              | -229.08284  | -229.01547     | -229.04817     |
| H <sub>2</sub> O                  | -76.41276   | -76.38789      | -76.40933      |
| C <sub>6</sub> H <sub>11</sub> OH | -311.08860  | -310.90570     | -310.94402     |
| FeCl <sub>3</sub>                 | -1504.14351 | -1504.13327    | -1504.17468    |
|                                   |             |                |                |
| INT1                              | -1560.46696 | -1559.97100    | -1560.06443    |
| TS1                               | -1560.44818 | -1559.95472    | -1560.04580    |
| INT2                              | -1560.45251 | -1559.95984    | -1560.05207    |
| TS2                               | -1560.44586 | -1559.95271    | -1560.04386    |
| INT3                              | -1254.94185 | -1254.54452    | -1254.61868    |
| TS3                               | -1490.80975 | -1490.23874    | -1490.33070    |
| INT4                              | -1490.91920 | -1490.33953    | -1490.42957    |
|                                   |             |                |                |
| INT1a                             | -3064.63407 | -3064.12582    | -3064.23903    |
| TS1a                              | -3064.61796 | -3064.11236    | -3064.22338    |
| INT2a                             | -3064.62639 | -3064.12008    | -3064.23100    |
| TS2a                              | -3064.61269 | -3064.10725    | -3064.21838    |
| INT3a                             | -2759.10257 | -2758.69308    | -2758.78720    |
| TS3a                              | -2994.97536 | -2994.39124    | -2994.50255    |
| INT4a                             | -2995.09081 | -2994.49872    | -2994.60874    |
|                                   |             |                |                |
| INT1b                             | -3064.64485 | -3064.13581    | -3064.24889    |
| TS1b                              | -3064.62332 | -3064.11711    | -3064.22923    |
| INT2b                             | -3064.62631 | -3064.12085    | -3064.23505    |
| TS2b                              | -3064.59506 | -3064.09012    | -3064.20340    |
| INT3b                             | -2759.10881 | -2758.69962    | -2758.79603    |
| TS3b                              | -2994.96441 | -2994.38063    | -2994.49242    |
| INT4b                             | -2995.09542 | -2994.50479    | -2994.61343    |
|                                   |             |                |                |

|       |             |             |             |
|-------|-------------|-------------|-------------|
| INT1c | -1560.48665 | -1559.99018 | -1560.08538 |
| TS1c  | -1560.45581 | -1559.96217 | -1560.05423 |
| INT2c | -1560.46216 | -1559.96717 | -1560.05843 |

## References

1. W. L. Man, G. Chen, S. M. Yiu, L. Shek, W. Y. Wong, W. T. Wong and T. C. Lau, *Dalton Trans.*, 2010, **39**, 11163.
2. D. D. Perrin and W. L. F. Armarego, *Purification of Laboratory Chemicals*, Pergamon, New York, 3rd edn., 1988.
3. (a) G. H. Jeffrey, J. Bassett, J. Mendham and R. C. Denny, *Vogel's Textbook of Quantitative Chemical Analysis*, Longman, Essex, 5th edn., 1989; (b) T. G. Traylor and J. P. Ciccone, *J. Am. Chem. Soc.*, 1989, **111**, 8413.
4. I. W. C. E. Arends, K. U. Ingold and D. D. M. Wayner, *J. Am. Chem. Soc.*, 1995, **117**, 4710.
5. (a) A. D. Becke, *J. Chem. Phys.* 1993, **98**, 5648; (b) C. Lee, W. Yang and R. G. Parr, *Phys. Rev. B*, 1988, **37**, 785.
6. (a) P. J. Hay and W. R. Wadt, *J. Chem. Phys.*, 1985, **82**, 270; (b) W. R. Wadt and P. J. Hay, *J. Chem. Phys.*, 1985, **82**, 284; (c) P. J. Hay and W. R. Wadt, *J. Chem. Phys.*, 1985, **82**, 299.
7. (a) S. Miertuš, E. Scrocco and J. Tomasi, *Chem. Phys.*, 1981, **55**, 117; (b) S. Miertuš and J. Tomasi, *Chem. Phys.*, 1982, **65**, 239.
